1 **A Cdk9-PP1 kinase-phosphatase switch regulates the elongation-termination**  
2 **transition of RNA polymerase II**

3

4 **Pabitra K. Parua<sup>1</sup>, Gregory T. Booth<sup>2</sup>, Miriam Sansó<sup>1</sup>, Bradley Benjamin<sup>1</sup>, Jason C.**  
5 **Tanny<sup>3</sup>, John T. Lis<sup>2</sup> and Robert P. Fisher<sup>1\*</sup>**

6

7 **<sup>1</sup>Department of Oncological Sciences, Icahn School of Medicine at Mount Sinai,**  
8 **New York, NY, USA**

9 **<sup>2</sup>Department of Molecular Biology and Genetics, Cornell University, Ithaca, NY,**  
10 **USA**

11 **<sup>3</sup>Department of Pharmacology and Therapeutics, McGill University, Montreal,**  
12 **Canada**

13

14 **\*Corresponding author:**

15 **Robert P. Fisher, Department of Oncological Sciences, Box 1130, Icahn School of**  
16 **Medicine at Mount Sinai, One Gustave L. Levy Place, New York, NY 10029, USA.**

17 **Phone: (212) 659-8677. Email: [robert.fisher@mssm.edu](mailto:robert.fisher@mssm.edu)**

18

19 **The end of the RNA polymerase II (Pol II) transcription cycle is strictly regulated to**  
20 **ensure proper mRNA maturation and prevent interference between neighboring**  
21 **genes<sup>1</sup>. Pol II slowing downstream of the cleavage and polyadenylation signal**  
22 **(CPS) leads to recruitment of cleavage and polyadenylation factors and**  
23 **termination<sup>2</sup>, but how this chain of events is initiated remains unclear. In a**  
24 **chemical-genetic screen, we identified protein phosphatase 1 (PP1) isoforms as**  
25 **substrates of human positive transcription elongation factor b (P-TEFb), the**  
26 **cyclin-dependent kinase 9 (Cdk9)-cyclin T1 complex<sup>3</sup>. Here we show that Cdk9 and**  
27 **PP1 govern phosphorylation of the conserved transcription factor Spt5 in the**  
28 **fission yeast *Schizosaccharomyces pombe*. Cdk9 phosphorylates both Spt5 and a**  
29 **negative regulatory site on the PP1 isoform Dis2<sup>4</sup>. Sites phosphorylated by Cdk9**  
30 **in the Spt5 carboxy-terminal domain (CTD) are dephosphorylated by Dis2 *in vitro*,**  
31 **and Cdk9 inhibition *in vivo* leads to rapid Spt5 dephosphorylation that is retarded**  
32 **by concurrent Dis2 inactivation. Chromatin immunoprecipitation and sequencing**  
33 **(ChIP-seq) analysis indicates that Spt5 is dephosphorylated as transcription**  
34 **complexes traverse the CPS, prior to or concomitant with slowing of Pol II<sup>5</sup>. A**  
35 **Dis2-inactivating mutation stabilizes Spt5 phosphorylation (pSpt5) on chromatin,**  
36 **promotes transcription beyond the normal termination zone detected by precision**  
37 **run-on transcription and sequencing (PRO-seq)<sup>6</sup>, and is suppressed by ablation of**  
38 **Cdk9 target sites in Spt5. These results support a model whereby the transition of**  
39 **Pol II from elongation to termination is regulated by opposing activities of Cdk9**  
40 **and Dis2 towards their common substrate Spt5—a bistable switch analogous to a**  
41 **Cdk1-PP1 module that controls mitotic progression<sup>4</sup>.**

42

43 In metazoans and fission yeast, commitment to and exit from mitosis depend on  
44 inhibitory phosphorylation of PP1 by Cdk1 and its reversal, respectively<sup>4</sup>. In human

45 extracts, analogue-sensitive (AS) Cdk9 modifies two isoforms of PP1, PP1 $\beta$  and PP1 $\gamma$ ,  
46 on conserved, carboxy-terminal sites analogous to the PP1 $\alpha$  residue labeled by Cdk1<sup>3,7</sup>.  
47 Of the two PP1 isoforms in fission yeast, Dis2 and Sds21, only Dis2 has the potential for  
48 inhibition by CDKs through phosphorylation of its Thr316 residue (Fig. 1a)<sup>8,9</sup>. Purified *S.*  
49 *pombe* Cdk9 phosphorylated Dis2 but not Sds21 *in vitro* (Fig. 1b); labeling was  
50 diminished by a *T316A* mutation changing Thr316 to alanine, but not by a Dis2-  
51 inactivating mutation<sup>10</sup>. Moreover, treatment of asynchronously growing *cdk9<sup>as</sup>* but not  
52 *cdk9<sup>+</sup>* cells with the bulky adenine analogue 3-MB-PP1, a selective inhibitor of AS  
53 Cdk9<sup>11</sup>, decreased Thr316 phosphorylation of chromatin-associated Dis2 (Fig. 1c),  
54 indicating that Dis2 is indeed regulated by Cdk9 *in vivo*.

55 The previously identified target of fission yeast Cdk9 is Thr1 in the CTD  
56 nonapeptide repeat T<sub>1</sub>P<sub>2</sub>A<sub>3</sub>W<sub>4</sub>N<sub>5</sub>S<sub>6</sub>G<sub>7</sub>S<sub>8</sub>K<sub>9</sub> of Spt5<sup>12,13</sup>. A phosphopeptide containing this  
57 sequence was dephosphorylated by PP1s purified from bacteria (Fig. 1d) or isolated  
58 from *S. pombe* (Fig. 1e, Extended Data Fig. 1). We recovered similar amounts of Dis2  
59 by immunoprecipitation from *dis2<sup>+</sup>* and *dis2-11* cold-sensitive mutant cell extracts, but  
60 detected activity only in the former, consistent with the previous observation that the  
61 enzyme encoded by *dis2-11* has diminished activity even at permissive temperatures<sup>10</sup>.  
62 Finally, the amount of Dis2 we recovered from *sds21 $\Delta$*  cells was similar to that from wild-  
63 type or *dis2-11* cells, but its activity was reduced, possibly suggesting a contribution by  
64 Sds21 to Dis2 activation. Together, these results indicate that Dis2 is a target of  
65 negative regulation by Cdk9 and a potential Spt5 phosphatase—an arrangement that  
66 predicts switch-like responses of pSpt5 to fluctuations in Cdk9 activity *in vivo* (Fig. 1f).

67 Consistent with this prediction, pSpt5 was rapidly lost after 3-MB-PP1 addition to  
68 exponentially growing *cdk9<sup>as</sup>* cells ( $T_{1/2} \approx 20$  sec) (Fig. 2a, and accompanying paper by  
69 Booth *et al.*). A comparison of Spt5 dephosphorylation kinetics after Cdk9 inhibition in

70 *dis2*<sup>+</sup> versus *dis2-11* cells revealed an ~2-fold decrease in the dephosphorylation rate  
71 due to the *dis2-11* mutation at a permissive temperature of 30°C, and an ~4-fold  
72 decrease in *cdk9<sup>as</sup> dis2-11* cells shifted to 18°C prior to 3-MB-PP1 addition (Fig. 2a,  
73 Extended Data Fig. 2a). Rapid decay at 18°C was restored by ectopic expression of  
74 active Dis2 in *dis2-11* cells (Fig. 2b). These results indicate that pSpt5 turnover is  
75 dependent on Dis2 activity in vivo.

76 Inhibition of the Cdk12 orthologue Lsk1 by 3-MB-PP1 treatment of *lsk1<sup>as</sup>* cells<sup>11</sup>  
77 had no effect on pSpt5 (Extended Data Fig. 2b) but rapidly diminished phosphorylation  
78 on Ser2 (pS2) of the Pol II CTD heptad repeat Y<sub>1</sub>S<sub>2</sub>P<sub>3</sub>T<sub>4</sub>S<sub>5</sub>P<sub>6</sub>S<sub>7</sub>. This mark became  
79 refractory to Lsk1 inhibition at 37°C in cells that harbored a temperature-sensitive  
80 mutation in *fcp1*<sup>14</sup>, which encodes a conserved pS2-specific phosphatase<sup>15,16</sup> (Fig. 2c).  
81 The rate of pS2 decay in *lsk1<sup>as</sup>* cells was unaffected by the *dis2-11* mutation (Extended  
82 Data Fig. 2c) and, conversely, Fcp1 inactivation had no effect on pSpt5 stability in *cdk9<sup>as</sup>*  
83 strains (Extended Data Fig. 2d). Therefore, orthogonal CDK-phosphatase pairs govern  
84 pS2 and pSpt5, possibly to allow independent regulation of the two modifications, both of  
85 which are implicated in transcription elongation<sup>17</sup>.

86 Dis2 also influences pSpt5 turnover on chromatin; by ChIP-quantitative PCR  
87 (ChIP-qPCR) analysis, pSpt5 became nearly undetectable on *eng1*<sup>+</sup> and *aro1*<sup>+</sup> genes  
88 within 2 min of 3-MB-PP1 addition to *cdk9<sup>as</sup> dis2*<sup>+</sup> cells (Fig. 2d, Extended Data Fig. 3a,  
89 b), but persisted in *cdk9<sup>as</sup> dis2-11* cells at 18°C (Fig. 2e, Extended Data Fig. 3c, d). Cdk9  
90 inhibition stimulated GFP-Dis2 recruitment to regions where pSpt5 was stabilized by  
91 Dis2 inactivation (Fig. 2f). Dis2 chromatin association was also enhanced by *cdk9ΔC*,  
92 which removes a carboxy-terminal region of Cdk9 needed for its efficient recruitment to  
93 chromatin<sup>18</sup>, and by *cdk9<sup>T212A</sup>*, which prevents Cdk9-activating phosphorylation<sup>19</sup>  
94 (Extended Data Fig. 4a). Therefore, Cdk9 restricts Dis2 recruitment to chromatin in

95 addition to its ability to inhibit Dis2 activity; both functions would promote switch-like  
96 changes in pSpt5 levels on genes in response to changes in Cdk9 activity.

97 ChIP-qPCR analysis of *hxxk2*<sup>+</sup> and *rps17a*<sup>+</sup> genes, in *cdk9*<sup>+</sup> cells with different *dis2*  
98 alleles at 30°C, revealed statistically significant increases in pSpt5 in the loss-of-function  
99 mutants *dis2Δ*, *dis2-11* and *dis2*<sup>T316D</sup> (aspartic acid substitution to mimic constitutive  
100 Thr316 phosphorylation<sup>4</sup>), relative to *dis2*<sup>+</sup> cells and cells harboring a CDK-refractory,  
101 *dis2*<sup>T316A</sup> allele (Fig. 2g, Extended Data Fig. 4b). Stabilization of pSpt5 was more  
102 prominent in *dis2-11* cells shifted to 18°C, and occurred preferentially in regions  
103 downstream of the CPS (compare Fig. 2h to 2g, Extended Data Fig. 4c to 4b). The  
104 relative increases in chromatin-associated pSpt5 in *dis2-11* and *dis2Δ* cells at 30°C  
105 correlated with the degree of bulk pSpt5 stabilization after Cdk9 inactivation (Fig. 2a,  
106 Extended Data Fig. 5a). We suspect that *dis2-11* is more severely affected than *dis2Δ*  
107 because loss of Dis2 protein allows more effective compensation by other phosphatases  
108 such as Sds21. An *sds21Δ* mutation, however, did not delay pSpt5 decay, and Cdk9  
109 inhibition did not increase chromatin recruitment of Sds21 (Extended Data Fig. 4d, 5b),  
110 indicating that, in wild-type cells, Dis2 is the major PP1 isoform that regulates pSpt5 in  
111 opposition to Cdk9.

112 In the accompanying paper, PRO-seq analysis uncovered a rate-limiting role for  
113 Cdk9 in Pol II elongation (Booth *et al.*). That function is likely to depend on Spt5,  
114 depletion of which slowed elongation and caused Pol II accumulation in upstream gene  
115 regions in fission yeast<sup>20</sup>, and disrupted coupling between 3'-processing and termination  
116 in budding yeast<sup>21</sup>. In ChIP-seq analysis, we detected total Spt5 and pSpt5 in the bodies  
117 of Pol II-transcribed genes (Fig. 3a), with the phosphorylated form accumulating further  
118 downstream of the transcription start site (TSS) (Fig. 3b). The patterns diverged again  
119 downstream of the CPS; a 3' peak of apparently unphosphorylated Spt5 is prominent in

120 metagene profiles (Fig. 3c) and individual gene tracks (Fig. 3d), and correlates with a  
121 peak of paused, Ser2-phosphorylated Pol II detected by Winston and co-workers<sup>20</sup>  
122 (Extended Data Fig. 6a-f).

123         The Spt5-Myc metagene profile features a V-shaped depression centered just  
124 upstream of the CPS (Fig. 3c), which is also seen in the Pol II pattern derived from  
125 published ChIP-seq data<sup>20</sup> (Extended Data Fig. 6c), and in a ChIP-seq analysis of Spt5  
126 in budding yeast, where it corresponds to a peak of Spt5 cross-linking to the nascent  
127 transcript<sup>21</sup>. Although exchange of phosphorylated for unphosphorylated Spt5 is  
128 possible, Spt5's tight association with the Pol II clamp<sup>22</sup> favors active dephosphorylation  
129 as a more likely explanation for the divergence between pSpt5 and Spt5-Myc occupancy  
130 downstream of the CPS—the same region where pSpt5 was preferentially stabilized by  
131 Dis2 inactivation. Moreover, Spt5 and Dis2 interact genetically; replacement of Thr1 with  
132 alanine in a truncated, seven-repeat Spt5 CTD—*spt5-(T1A)<sub>7</sub>*, which by itself imparts  
133 cold-sensitivity<sup>23</sup>—partially suppressed cold-sensitive lethality due to *dis2-11*, whereas a  
134 phosphomimetic *spt5-(T1E)<sub>7</sub>* mutation (which did not affect growth on its own<sup>23</sup>)  
135 exacerbated this phenotype (Fig. 3e, Extended Data Fig. 7).

136         We next performed PRO-seq analysis<sup>6</sup> to uncover effects of Dis2 inactivation on  
137 the distribution of transcriptionally engaged Pol II (Fig. 4, Extended Data Fig. 8). On  
138 individual genes, transcribing Pol II decreased dramatically within a narrowly defined  
139 zone following the CPS in *dis2*<sup>+</sup> cells, but this zone extended ~500 bp further  
140 downstream in *dis2-11* cells at both 18°C and 30°C. Alignment of PRO-seq and ChIP-  
141 seq read distributions suggested correlation between the zone of Dis2-dependent  
142 termination and Spt5 dephosphorylation (Fig. 4a). Metagene analysis of PRO-seq data  
143 (Fig. 4b, c, Extended Data Fig. 9a, b) revealed pleiotropic effects of the *dis2-11*  
144 mutation: 1) attenuated pausing in promoter-proximal regions<sup>5</sup>; 2) decreased density of  
145 transcribing Pol II throughout gene bodies; and 3) increased transcription beyond the

146 CPS, both in absolute terms and relative to transcription of upstream regions. All three  
147 defects were apparent at both 18°C and 30°C, indicating that the effects of Dis2  
148 inactivation on Pol II distribution are constitutive. Loss of viability occurs only at low  
149 temperatures, however, and is likely due in part to inappropriate persistence of pSpt5  
150 (Fig. 2a), as suggested by the partial rescue achieved with the *spt5-(T1A)<sub>7</sub>* mutation (Fig.  
151 3e).

152 To quantify termination defects due to Dis2 impairment, we defined two metrics  
153 based on PRO-seq read distribution: Termination Index (T.I.), the ratio of signals in the  
154 regions 500 bp downstream and upstream of the CPS; and Termination Elongation  
155 Index (T.E.I.), the signal ratio in the regions 250-750 bp downstream and 500 bp  
156 upstream of the CPS (Fig. 4d). The *dis2-11* mutation caused statistically significant  
157 increases in T.I. in *cdk9<sup>+</sup>* cells, and in T.E.I. in both *cdk9<sup>+</sup>* and *cdk9<sup>as</sup>* backgrounds (Fig.  
158 4e). A heatmap analysis of genes ranked by T.E.I. revealed termination-zone expansion  
159 consistent with decreased termination efficiency upon loss of Dis2 function (Fig. 4f,  
160 Extended Data Fig. 9c). In the accompanying paper, Booth *et al.* show that Cdk9  
161 inhibition has the opposite effect—decreasing both T.I. and T.E.I.—consistent with  
162 functional antagonism between the kinase and phosphatase.

163 Recent studies suggest an ordered series of events at 3'-ends of protein-coding  
164 genes: 1) slowing of elongation, 2) increased pS2 as a consequence of this pause, 3)  
165 cleavage and polyadenylation factor (CPF) recruitment to the pS2-containing CTD, 4)  
166 CPF-dependent cleavage and 5) termination facilitated by the 5'→3' exoribonuclease  
167 XRN2/Rat1<sup>2,3,21,24,25</sup>. This sequence can be initiated ectopically by a block to transcription  
168 imposed *in cis*<sup>2</sup>, and pS2 is elevated in 5' gene regions by mutations that decrease the  
169 intrinsic elongation rate of Pol II<sup>26</sup>, but a physiologic trigger remains unknown. Both Spt5  
170 and PP1 are implicated in this transition—the former as a regulator of Pol II processivity  
171 and rate<sup>20,21,27</sup>, the latter as a CPF component<sup>28,29</sup>. We now show that Spt5 and the PP1

172 isoform Dis2 are both substrates of Cdk9, a positive regulator of elongation<sup>30</sup>. The  
173 enzyme-substrate relationships we define among Cdk9, Dis2 and Spt5 recapitulate an  
174 important cell-cycle regulatory module<sup>4</sup>, and suggest a model of “transcriptional exit”  
175 (Fig. 4g): Dis2-dependent Spt5 dephosphorylation upon reversal of a Cdk9-PP1 switch,  
176 leading to slowing of Pol II to facilitate its capture and dissociation by XRN2/Rat1.

177

- 178 1 Proudfoot, N. J. Transcriptional termination in mammals: Stopping the RNA  
179 polymerase II juggernaut. *Science* **352**, aad9926, doi:10.1126/science.aad9926  
180 (2016).
- 181 2 Davidson, L., Muniz, L. & West, S. 3' end formation of pre-mRNA and  
182 phosphorylation of Ser2 on the RNA polymerase II CTD are reciprocally coupled  
183 in human cells. *Genes Dev* **28**, 342-356, doi:10.1101/gad.231274.113 (2014).
- 184 3 Sanso, M. *et al.* P-TEFb regulation of transcription termination factor Xrn2  
185 revealed by a chemical genetic screen for Cdk9 substrates. *Genes Dev* **30**, 117-  
186 131, doi:10.1101/gad.269589.115 (2016).
- 187 4 Grallert, A. *et al.* A PP1-PP2A phosphatase relay controls mitotic progression.  
188 *Nature* **517**, 94-98, doi:10.1038/nature14019 (2015).
- 189 5 Booth, G. T., Wang, I. X., Cheung, V. G. & Lis, J. T. Divergence of a conserved  
190 elongation factor and transcription regulation in budding and fission yeast.  
191 *Genome Res* **26**, 799-811, doi:10.1101/gr.204578.116 (2016).
- 192 6 Kwak, H., Fuda, N. J., Core, L. J. & Lis, J. T. Precise maps of RNA polymerase  
193 reveal how promoters direct initiation and pausing. *Science* **339**, 950-953,  
194 doi:10.1126/science.1229386 (2013).
- 195 7 Blethrow, J. D., Glavy, J. S., Morgan, D. O. & Shokat, K. M. Covalent capture of  
196 kinase-specific phosphopeptides reveals Cdk1-cyclin B substrates. *Proc Natl*  
197 *Acad Sci U S A* **105**, 1442-1447 (2008).
- 198 8 Ohkura, H., Kinoshita, N., Miyatani, S., Toda, T. & Yanagida, M. The fission  
199 yeast *dis2+* gene required for chromosome disjoining encodes one of two  
200 putative type 1 protein phosphatases. *Cell* **57**, 997-1007 (1989).
- 201 9 Yamano, H., Ishii, K. & Yanagida, M. Phosphorylation of *dis2* protein  
202 phosphatase at the C-terminal *cdc2* consensus and its potential role in cell cycle  
203 regulation. *EMBO J* **13**, 5310-5318 (1994).
- 204 10 Kinoshita, N., Ohkura, H. & Yanagida, M. Distinct, essential roles of type 1 and  
205 2A protein phosphatases in the control of the fission yeast cell division cycle. *Cell*  
206 **63**, 405-415 (1990).
- 207 11 Viladevall, L. *et al.* TFIIH and P-TEFb coordinate transcription with capping  
208 enzyme recruitment at specific genes in fission yeast. *Mol Cell* **33**, 738-751  
209 (2009).
- 210 12 Pei, Y. & Shuman, S. Characterization of the *Schizosaccharomyces pombe*  
211 Cdk9/Pch1 protein kinase: Spt5 phosphorylation, autophosphorylation, and  
212 mutational analysis. *J Biol Chem* **278**, 43346-43356 (2003).
- 213 13 Sansó, M. *et al.* A Positive Feedback Loop Links Opposing Functions of P-  
214 TEFb/Cdk9 and Histone H2B Ubiquitylation to Regulate Transcript Elongation in  
215 Fission Yeast. *PLoS Genet* **8**, e1002822 (2012).



- 216 14 Sajiki, K. *et al.* Genetic control of cellular quiescence in *S. pombe*. *J Cell Sci* **122**,  
217 1418-1429, doi:10.1242/jcs.046466 (2009).
- 218 15 Cho, E. J., Kobor, M. S., Kim, M., Greenblatt, J. & Buratowski, S. Opposing  
219 effects of Ctk1 kinase and Fcp1 phosphatase at Ser 2 of the RNA polymerase II  
220 C-terminal domain. *Genes Dev* **15**, 3319-3329 (2001).
- 221 16 Hausmann, S. & Shuman, S. Characterization of the CTD phosphatase Fcp1  
222 from fission yeast. Preferential dephosphorylation of serine 2 versus serine 5. *J*  
223 *Biol Chem* **277**, 21213-21220 (2002).
- 224 17 Sansó, M. & Fisher, R. P. Pause, Play, Repeat: CDKs Push RNAP II's Buttons.  
225 *Transcription* **4** (2013).
- 226 18 St Amour, C. V. *et al.* Separate Domains of Fission Yeast Cdk9 (P-TEFb) Are  
227 Required for Capping Enzyme Recruitment and Primed (Ser7-Phosphorylated)  
228 Rpb1 Carboxyl-Terminal Domain Substrate Recognition. *Mol Cell Biol* **32**, 2372-  
229 2383 (2012).
- 230 19 Pei, Y. *et al.* Cyclin-dependent kinase 9 (Cdk9) of fission yeast is activated by the  
231 CDK-activating kinase Csk1, overlaps functionally with the TFIIH-associated  
232 kinase Mcs6, and associates with the mRNA cap methyltransferase Pcm1 in  
233 vivo. *Mol Cell Biol* **26**, 777-788 (2006).
- 234 20 Shetty, A. *et al.* Spt5 Plays Vital Roles in the Control of Sense and Antisense  
235 Transcription Elongation. *Mol Cell* **66**, 77-88 e75,  
236 doi:10.1016/j.molcel.2017.02.023 (2017).
- 237 21 Baejen, C. *et al.* Genome-wide Analysis of RNA Polymerase II Termination at  
238 Protein-Coding Genes. *Mol Cell* **66**, 38-49 e36, doi:10.1016/j.molcel.2017.02.009  
239 (2017).
- 240 22 Bernecky, C., Herzog, F., Baumeister, W., Plitzko, J. M. & Cramer, P. Structure  
241 of transcribing mammalian RNA polymerase II. *Nature* **529**, 551-554,  
242 doi:10.1038/nature16482 (2016).
- 243 23 Schneider, S., Pei, Y., Shuman, S. & Schwer, B. Separable functions of the  
244 fission yeast Spt5 carboxyl-terminal domain (CTD) in capping enzyme binding  
245 and transcription elongation overlap with those of the RNA polymerase II CTD.  
246 *Mol Cell Biol* **30**, 2353-2364 (2010).
- 247 24 Fong, N. *et al.* Effects of Transcription Elongation Rate and Xrn2 Exonuclease  
248 Activity on RNA Polymerase II Termination Suggest Widespread Kinetic  
249 Competition. *Mol Cell* **60**, 256-267, doi:10.1016/j.molcel.2015.09.026 (2015).
- 250 25 Glover-Cutter, K., Kim, S., Espinosa, J. & Bentley, D. L. RNA polymerase II  
251 pauses and associates with pre-mRNA processing factors at both ends of genes.  
252 *Nat Struct Mol Biol* **15**, 71-78 (2008).
- 253 26 Fong, N., Saldi, T., Sheridan, R. M., Cortazar, M. A. & Bentley, D. L. RNA Pol II  
254 Dynamics Modulate Co-transcriptional Chromatin Modification, CTD  
255 Phosphorylation, and Transcriptional Direction. *Mol Cell*,  
256 doi:10.1016/j.molcel.2017.04.016 (2017).
- 257 27 Yamada, T. *et al.* P-TEFb-mediated phosphorylation of hSpt5 C-terminal repeats  
258 is critical for processive transcription elongation. *Mol Cell* **21**, 227-237 (2006).
- 259 28 Schrieck, A. *et al.* RNA polymerase II termination involves C-terminal-domain  
260 tyrosine dephosphorylation by CPF subunit Glc7. *Nat Struct Mol Biol* **21**, 175-  
261 179, doi:10.1038/nsmb.2753 (2014).
- 262 29 Vanoosthuyse, V. *et al.* CPF-associated phosphatase activity opposes  
263 condensin-mediated chromosome condensation. *PLoS Genet* **10**, e1004415,  
264 doi:10.1371/journal.pgen.1004415 (2014).
- 265 30 Peterlin, B. M. & Price, D. H. Controlling the elongation phase of transcription  
266 with P-TEFb. *Mol Cell* **23**, 297-305 (2006).

267

268 **Acknowledgements** We thank I.M. Hagan, B. Schwer, S. Shuman, M. Yanagida and  
269 M.J. O'Connell for providing yeast strains and antibodies; K. M. Shokat for providing 3-  
270 MB-PP1; C. Zhang for guidance in AS-allele optimization; and N. Steinbach and R.  
271 Parsons for advice and assistance in phosphatase activity measurements. J.C.T. was  
272 supported by Canadian Institutes of Health Research grant MOP-130362 and by a  
273 fellowship from Fond de recherche Quebec Santé (3315). This work was supported by  
274 National Institutes of Health grants GM25232 to G.T.B. and J.T.L., and GM104291 to  
275 R.P.F.

276

277 **Author Contributions** P.P., G.T.B. and M.S. designed and performed experiments and  
278 performed data analysis. B.B. and J.C.T. performed data analysis. P.P., G.T.B., J.T.L.  
279 and R.P.F. prepared the manuscript.

280

281 **Author Information** Correspondence and requests for materials should be addressed to  
282 [robert.fisher@mssm.edu](mailto:robert.fisher@mssm.edu)

283

## 284 **METHODS**

285 **Yeast strains and standard methods.** Fission yeast strains used in this study are listed  
286 in Extended Data Table 1. New strains were generated by standard techniques<sup>31</sup>. Cells  
287 were grown in YES medium at 30°C unless otherwise specified.

288

289 **Immunological methods.** Antibodies used in this study recognized pSpt5 or total  
290 Spt5<sup>13</sup>, Dis2-pT316<sup>4</sup> or total Dis2<sup>32</sup>, Myc epitope (EMD Millipore, 05-724), total Pol II  
291 (BioLegend, MMS-126R), Pol II pSer2 (Abcam, ab5095),  $\alpha$ -tubulin (Sigma, T-5168) and  
292 green fluorescent protein (GFP) (Invitrogen, rabbit polyclonal (A11122) or Santa Cruz,

293 mouse monoclonal (sc-9996)). Proteins were visualized in immunoblot analysis either by  
294 enhanced chemiluminescence (ECL, HyGLO HRP detection kit, Denville Scientific,  
295 E250) or with Odyssey Imaging System (LI-COR Biosciences).

296

297 **Kinase and phosphatase assays.** Kinase assays were performed with purified proteins  
298 (Cdk9/Pch1 complex and GST-Spt5<sup>801-990</sup>) and [ $\gamma$ -<sup>32</sup>P] ATP (PerkinElmer,  
299 BLU002A250UC), as described previously<sup>19</sup>. GST-PP1s were expressed in *E. coli* at  
300 16°C for 16 h and purified with Glutathione Sepharose 4 Fast Flow beads<sup>33</sup>. To measure  
301 protein phosphatase activity, PP1 isoforms (GST-Dis2 or GST-Sds21) purified from *E.*  
302 *coli* (2  $\mu$ g) or immunoprecipitated from fission yeast extracts (4 mg total protein) were  
303 incubated with 50  $\mu$ M peptide (Spt5-NP, Spt5-pT1 or H3pS10) at 37°C for 1 h.  
304 Colorimetric assays were performed in triplicate using BioMOL Green (Enzo Life  
305 Sciences, BML-AK111) in 25 mM HEPES (pH 7.5), 100 mM NaCl, 1 mM MnCl<sub>2</sub> and 1  
306 mM DTT, in 96-well plates as described in manufacturer's protocol.

307

308 **Chromatin immunoprecipitation analysis.** Immunoprecipitation and chromatin  
309 immunoprecipitation (ChIP) were carried out by published methods<sup>18,34,35</sup>. Quantitative  
310 PCR was performed with USB VeriQuest SYBR Green qPCR Master Mix (2x)  
311 (Affymetrix, 75600) in 386-well plates. To measure the dependency of Dis2-Thr316  
312 phosphorylation on Cdk9 *in vivo*, cells expressing GFP-Dis2 from the chromosomal *dis2*  
313 locus in either *cdk9*<sup>+</sup> or *cdk9*<sup>as</sup> background were grown at 30°C to a density of ~ 1.5 x  
314 10<sup>7</sup> ml<sup>-1</sup>, treated with either DMSO or 10  $\mu$ M 3-MB-PP1 for 10 min, and crosslinked with  
315 1% formaldehyde for 15 min at 25°C. Chromatin extracts were prepared according to a  
316 standard protocol for ChIP sample preparation<sup>18,34,35</sup> and 5 mg total protein was  
317 subjected to immunoprecipitation with anti-GFP antibody (sc-9996) and immunoblot  
318 analysis with either anti-GFP or anti-Dis2-pT316 antibody<sup>4</sup>.

319

320 **Chemical genetics.** To measure rates of Spt5 and Rpb1 dephosphorylation after CDK  
321 inhibition, cells were grown at 30°C in YES medium to a density of  $\sim 1.2 \times 10^7$  cells/ml,  
322 harvested by centrifugation at 25°C, resuspended in fresh YES (preincubated at desired  
323 temperature) and incubated for 10 min before addition of DMSO or 3-MB-PP1. At  
324 intervals after addition of DMSO or 3-MB-PP1, cells ( $\sim 0.6 \times 10^8$ ) were transferred directly  
325 to tubes containing 500  $\mu$ l 100% (w/v) trichloroacetic acid (TCA) and harvested by  
326 centrifugation. Protein extracts were prepared in the presence of 20% (w/v) TCA<sup>36</sup> and  
327 processed for immunoblot analysis with appropriate antibodies.

328

329 **ChIP-seq.** Multiplexed ChIP-seq libraries were prepared using the Illumina TruSeq DNA  
330 Sample Preparation kit v2 with 75 ng of input or IP DNA and barcode adaptors. Paired-  
331 end sequencing (50-nt reads) was performed on an Illumina HiSeq 2000 (Genome  
332 Quebec Innovation Centre, McGill University). After adaptor trimming and quality control,  
333 processed FASTQ files were aligned to the *S. pombe* genome using Bowtie2<sup>37</sup> (Galaxy  
334 Version 2.2.6.2). Aligned sequences of each biological replicate were fed into MACS2<sup>38</sup>  
335 (Galaxy Version 2.1.1.20160309.0) to call peaks from alignment results. Generated  
336 “bedgraph treatment” files were concatenated (Galaxy Version 1.0.1) to combine  
337 replicates of each sample, converted into bigwig using “Wig/BedGraph-to-bigWig  
338 converter” (Galaxy Version 1.1.0) and processed using computeMatrix (Galaxy Version  
339 2.3.6.0) in DeepTools<sup>39</sup> to prepare data for plotting a heatmap and/ or a profile of given  
340 regions. Heatmap and Metagene plots were generated using “plotHeatmap” (Galaxy  
341 Version 2.5.0.0) and “plotProfile” (Galaxy Version 2.5.0.0) tools, respectively.

342

343 **PRO-seq.** For PRO-seq analysis, all samples, with the exception of the wild-type (*wt*)  
344 strain (prepared separately), were prepared simultaneously and in biological replicates.

345 A detailed description of PRO-seq libraries can be found in the methods of the  
346 accompanying manuscript (Booth *et al.*). Briefly, biological replicates for each strain  
347 were derived from separately picked colonies. Cultures were grown in YES medium at  
348 30°C overnight and diluted to an OD<sub>600</sub> = 0.2. After reaching OD<sub>600</sub> ≈ 0.5, an equal  
349 number of cells (based on OD) was set aside for all treatments (~10 ml culture). At this  
350 point, a fixed amount of thawed *S. cerevisiae* (50 µl, OD = 0.68) was spiked into each  
351 sample. Cells were spun down and resuspended in fresh YES medium, pre-conditioned  
352 at the desired temperature (30°C or 18°C) and allowed to incubate for 10 min. Samples  
353 were immediately spun down at 4 °C and subjected to permeabilization and library  
354 preparation as described by Booth *et al.*, using the standard 5' and 3' RNA adaptors<sup>40</sup>.  
355 Sequencing, alignment and processing of reads were conducted as described in the  
356 accompanying paper.

357

### 358 **Data Access**

359 The raw and processed sequencing files have been submitted to the NCBI Gene  
360 Expression Omnibus (GEO; <http://www.ncbi.nlm.nih.gov/geo/>) (Accession number  
361 pending).

362

- 363 31 Moreno, S., Klar, A. & Nurse, P. Molecular genetic analysis of fission yeast  
364 *Schizosaccharomyces pombe*. *Methods Enzymol.* **194**, 795-823 (1991).  
365 32 Stone, E. M., Yamano, H., Kinoshita, N. & Yanagida, M. Mitotic regulation of  
366 protein phosphatases by the fission yeast sds22 protein. *Curr Biol* **3**, 13-26  
367 (1993).  
368 33 Parua, P. K., Mondal, A. & Parrack, P. HflD, an Escherichia coli protein involved  
369 in the lambda lysis-lysogeny switch, impairs transcription activation by  
370 lambdaCII. *Arch Biochem Biophys* **493**, 175-183, doi:10.1016/j.abb.2009.10.010  
371 (2010).  
372 34 Sanso, M. *et al.* Gcn5 facilitates Pol II progression, rather than recruitment to  
373 nucleosome-depleted stress promoters, in *Schizosaccharomyces pombe*.  
374 *Nucleic Acids Res* **39**, 6369-6379 (2011).  
375 35 Tanny, J. C., Erdjument-Bromage, H., Tempst, P. & Allis, C. D. Ubiquitylation of  
376 histone H2B controls RNA polymerase II transcription elongation independently  
377 of histone H3 methylation. *Genes Dev* **21**, 835-847 (2007).

- 378 36 Kao, C. F. & Osley, M. A. In vivo assays to study histone ubiquitylation. *Methods*  
379 **31**, 59-66 (2003).
- 380 37 Langmead, B. & Salzberg, S. L. Fast gapped-read alignment with Bowtie 2. *Nat*  
381 *Methods* **9**, 357-359, doi:10.1038/nmeth.1923 (2012).
- 382 38 Feng, J., Liu, T., Qin, B., Zhang, Y. & Liu, X. S. Identifying ChIP-seq enrichment  
383 using MACS. *Nat Protoc* **7**, 1728-1740, doi:10.1038/nprot.2012.101 (2012).
- 384 39 Ramirez, F. *et al.* deepTools2: a next generation web server for deep-sequencing  
385 data analysis. *Nucleic Acids Res* **44**, W160-165, doi:10.1093/nar/gkw257 (2016).
- 386 40 Mahat, D. B. *et al.* Base-pair-resolution genome-wide mapping of active RNA  
387 polymerases using precision nuclear run-on (PRO-seq). *Nat Protoc* **11**, 1455-  
388 1476, doi:10.1038/nprot.2016.086 (2016).
- 389
- 390

391 **Figures**

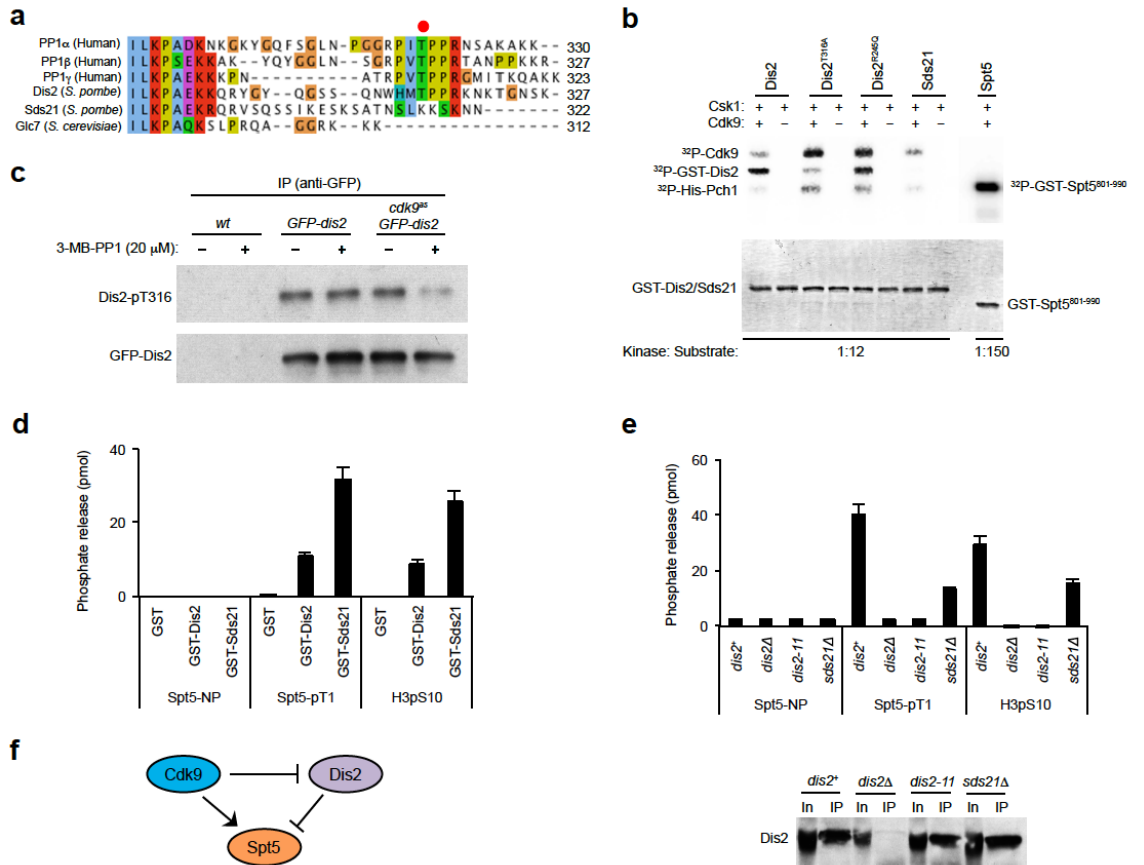

392

393 **Figure 1 | A Cdk9-Dis2-Spt5 circuit.** **a**, Alignment of C-termini of human and fungal  
 394 PP1 isoforms. In chemical-genetic screens, Thr320 in PP1 $\alpha$  was identified as a potential  
 395 target of Cdk1, and analogous residues in PP1 $\beta$  and PP1 $\gamma$  were identified as potential  
 396 targets of Cdk9. This site of phospho-regulation (indicated by a red dot) is conserved in  
 397 one of the two PP1 isoforms in fission yeast (Dis2-T316), but not in the other (Sds21), or  
 398 in the budding yeast PP1 catalytic subunit Glc7. **b**, Phosphorylation of Dis2-T316 by  
 399 Cdk9 *in vitro*. Purified, insect-cell derived Cdk9/Pch1 complexes were incubated at  
 400 indicated molar ratios with purified, bacterially expressed GST-PP1 or GST-Spt5<sup>801-990</sup>  
 401 (containing the CTD), after activation by the CDK-activating kinase Csk1 (incubated  
 402 alone in indicated lanes). In addition to wild-type Dis2, we tested Dis2<sup>T316A</sup> and Dis2<sup>R245Q</sup>,  
 403 the variant encoded by *dis2-11*. Autophosphorylation occurs on both Cdk9 and Pch1.

404 (Top: autoradiogram; bottom: Coomassie-stained gel to confirm equal loading.) **c**, Cdk9-  
405 dependence of Dis2-T316 phosphorylation *in vivo*. Cells of *cdk9<sup>as</sup>* strains, with or without  
406 GFP-tagged Dis2 expressed from the chromosomal *dis2<sup>+</sup>* locus, were treated for 10 min  
407 with 20  $\mu$ M 3-MB-PP1 or mock-treated, as indicated. Chromatin extracts were  
408 immunoprecipitated with anti-GFP antibodies and probed with antibodies specific for  
409 Dis2 phosphorylated at Thr316 (Dis2-T316P) or GFP. **d**, Spt5 dephosphorylation by  
410 purified PP1 *in vitro*. Purified GST-Dis2 and GST-Sds21 were incubated with a control  
411 phosphopeptide derived from histone H3 (“H3pS10”), an Spt5 CTD consensus  
412 phosphopeptide (“Spt5-pT1”), or a non-phosphorylated peptide of the same sequence  
413 (“Spt5-NP”). **e**, Spt5 dephosphorylation by PP1 isolated from fission yeast. A polyclonal  
414 anti-Dis2 antibody immunoprecipitates pSpt5 phosphatase activity from extracts of *dis2<sup>+</sup>*  
415 but not *dis2* mutant cells. Note: the antibody cross-reacts with Sds21 in immunoblots but  
416 does not efficiently immunoprecipitate Sds21. For **d**, **e**,  $n = 3$  biological replicates; error  
417 bars show standard deviation (s.d.). **f**, A Cdk9-Dis2-Spt5 circuit diagram.  
418



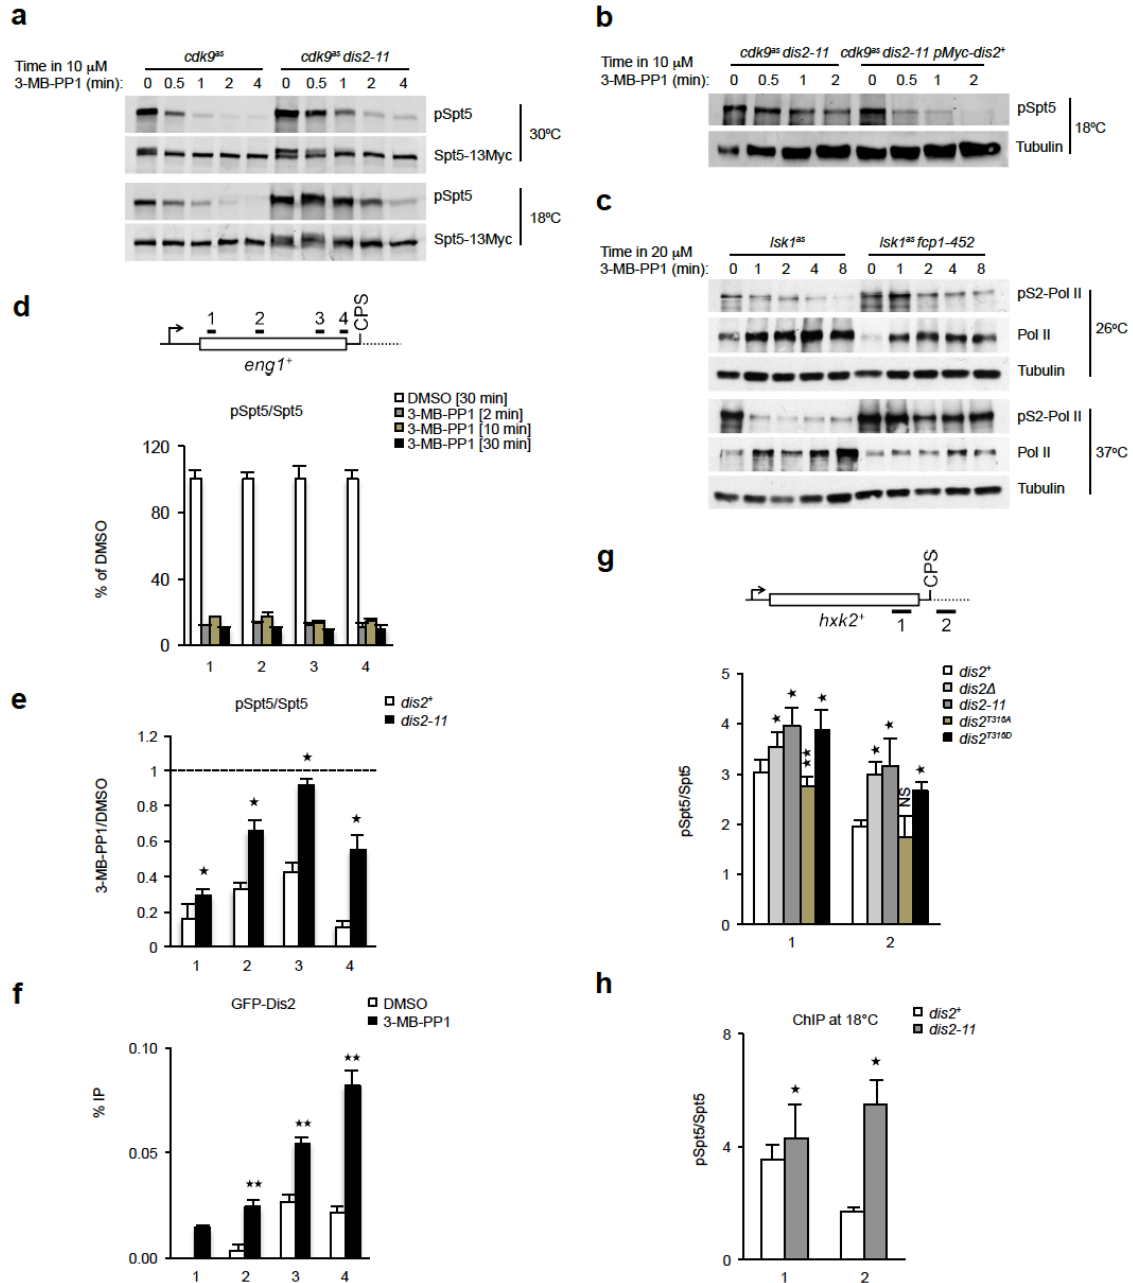

419

420 **Figure 2 | Cdk9 and Dis2 regulate Spt5 phosphorylation *in vivo*.** **a**, Dis2 inactivation  
 421 stabilizes pSpt5 after Cdk9 inhibition. Fission yeast strains—*cdk9<sup>as</sup> spt5-13Myc dis2<sup>+</sup>* or  
 422 *cdk9<sup>as</sup> spt5-13Myc dis2-11*—were grown to mid-log phase at 30°C and shifted to 18°C  
 423 (bottom) or not shifted (top) for 10 min, before addition of 10  $\mu$ M 3-MB-PP1, after which  
 424 cultures were sampled at indicated times and subjected to immunoblot analysis with  
 425 anti-pSpt5 or anti-Myc antibodies. **b**, Ectopic expression of wild-type Dis2 restores rapid

426 Spt5 dephosphorylation kinetics in a *dis2* mutant. Anti-pSpt5 immunoblots from *cdk9<sup>as</sup>*  
427 *dis2-11* cells shifted to 18°C and treated with 10 μM 3-MB-PP1 for indicated times,  
428 without or with expression of Myc-Dis2 from a plasmid. **c**, Fcp1 inactivation stabilizes  
429 Rpb1 Ser2 phosphorylation after Lsk1 inhibition. Fission yeast strains—*lsk1<sup>as</sup>* or *lsk1<sup>as</sup>*  
430 *fcp1-452*—were shifted to 37°C (or not shifted), treated for the indicated time with 20 μM  
431 3-MB-PP1, and analyzed by immunoblotting for Rpb1-Ser2 phosphorylation. Note: CTD  
432 dephosphorylation leads to increased reactivity with the 8WG16 antibody used to detect  
433 total Pol II. **d**, Rapid pSpt5 turnover on chromatin. ChIP-qPCR analysis of pSpt5 versus  
434 total Spt5 crosslinking at the *eng1<sup>+</sup>* gene after 3-MB-PP1 treatment for various times  
435 (expressed as a percentage of signal in the absence of inhibitor). **e**, Dis2 inactivation  
436 stabilizes chromatin-associated pSpt5. Either *cdk9<sup>as</sup> spt5-13myc* or *cdk9<sup>as</sup> spt5-13myc*  
437 *dis2-11* cells were shifted to 18°C and treated with 10 μM 3-MB-PP1 or mock-treated  
438 with DMSO for 2 min and subjected to ChIP-qPCR analysis at *eng1<sup>+</sup>* for pSpt5 and total  
439 Spt5 (anti-Myc). The signal ratios between the two treatments were plotted for each  
440 condition. (Note: higher residual pSpt5 in *cdk9<sup>as</sup> dis2<sup>+</sup>* cells, compared to those analyzed  
441 in Fig. 2d, may reflect less efficient dephosphorylation at 18°C, relative to 30°C.) **f**,  
442 Suppression of Dis2 recruitment to transcribed chromatin by Cdk9. ChIP-qPCR analysis  
443 of GFP-Dis2 crosslinking at *eng1<sup>+</sup>* in *cdk9<sup>as</sup> GFP-dis2* cells treated for 10 min with 10 μM  
444 3-MB-PP1. **g**, pSpt5 on chromatin in *dis2* mutants. ChIP-qPCR analysis of indicated  
445 strains upstream and downstream of CPS on *hvk2<sup>+</sup>* gene at 30°C. **h**, Comparison of  
446 pSpt5:Spt5 ratio upstream and downstream of CPS on *hvk2<sup>+</sup>* gene in *dis2<sup>+</sup>* and *dis2-11*  
447 cells at 18°C. For **d-h**, *n* = 4 biological replicates; error bars show standard deviation  
448 (s.d.); asterisks indicate *p*-values (Student's *t*-test: [\*] *p* < 0.05; [\*\*] *p* < 0.001; [NS] not  
449 significant) between wild-type (*dis2<sup>+</sup>*) and mutant (*dis2Δ*, *dis2-11*, *dis2<sup>T316A</sup>* or *dis2<sup>T316D</sup>*)  
450 cells (**e**, **g**, **h**), or between 3-MB-PP1 and DMSO treatment (**f**).

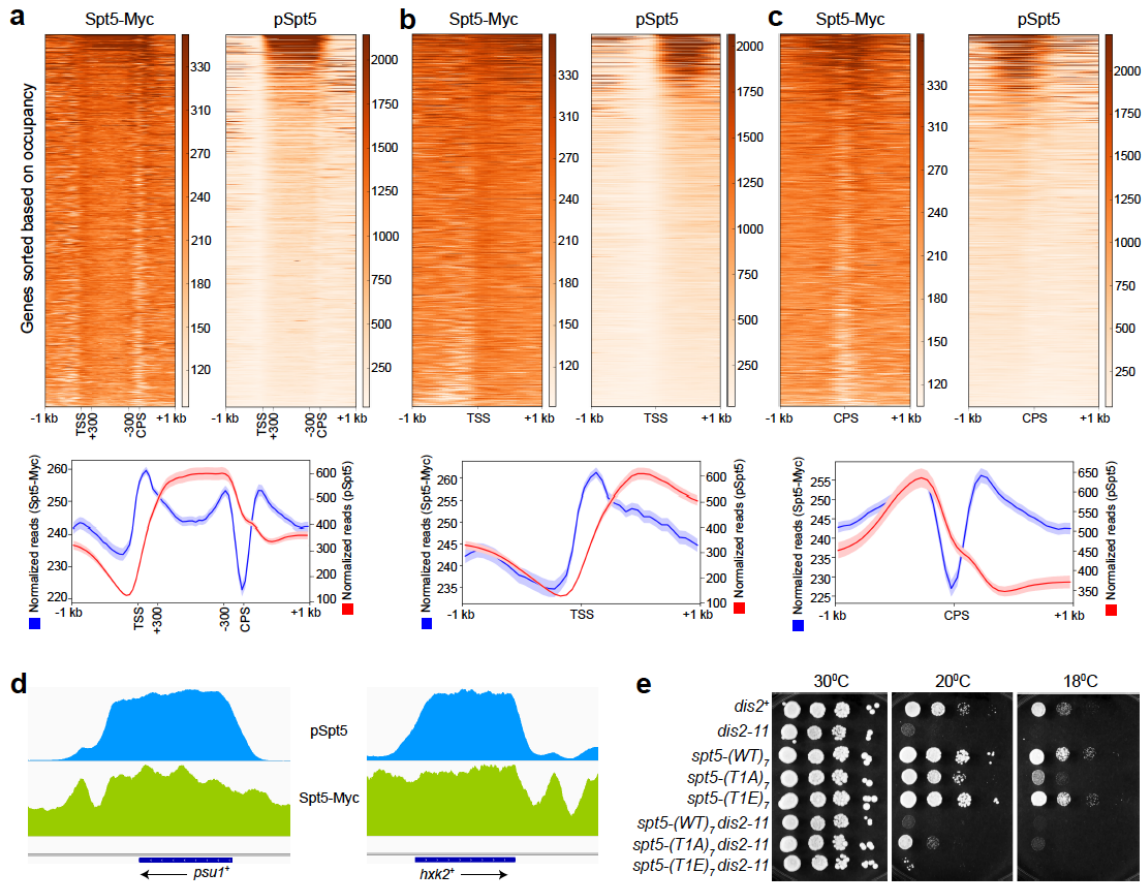

451

452 **Figure 3 | The Spt5 CTD is phosphorylated in gene bodies and unphosphorylated**

453 **in the termination zone. a**, pSpt5 distribution on transcribed genes. Heatmaps (top)

454 and metagene analysis (bottom) reveal the pattern of Spt5-Myc and pSpt5 occupancy

455 across transcribed genes, filtered to exclude those with neighboring genes closer than 1

456 kb. (Note: In this representation, the regions between +300 bp relative to the TSS and -

457 300 bp relative to the CPS have been scaled to allow comparisons among genes of

458 different lengths.) **b**, pSpt5 distribution around the TSS. An unscaled, TSS-centered

459 metagene analysis reveals a broad peak of pSpt5 downstream of TSS. **c**, Spt5

460 dephosphorylation in the termination zone. Unscaled metagene analysis centered at the

461 CPS reveals a monotonic drop in pSpt5, but “twin peaks” of total, Myc-tagged Spt5. **d**,

462 Spt5 dephosphorylation downstream of the CPS. Individual gene tracks show

463 accumulation of Spt5-myc in the region downstream of the CPS with no concomitant

464 peak of pSpt5. **e**, Suppression of *dis2-11* by an Spt5 CTD mutant that cannot be  
465 phosphorylated by Cdk9. Serial dilutions of indicated strains grown at 30°C, 20°C and  
466 18°C. The *spt5* mutant alleles tested were: *spt5-(wt)<sub>7</sub>*, in which the CTD is truncated from  
467 18 to seven wild-type, nonapeptide repeats; *spt5-(T1A)<sub>7</sub>*, in which each Thr1 position in  
468 the seven repeats is changed to alanine; and *spt5-(T1E)<sub>7</sub>*, in which each Thr1 is  
469 changed to glutamic acid.  
470

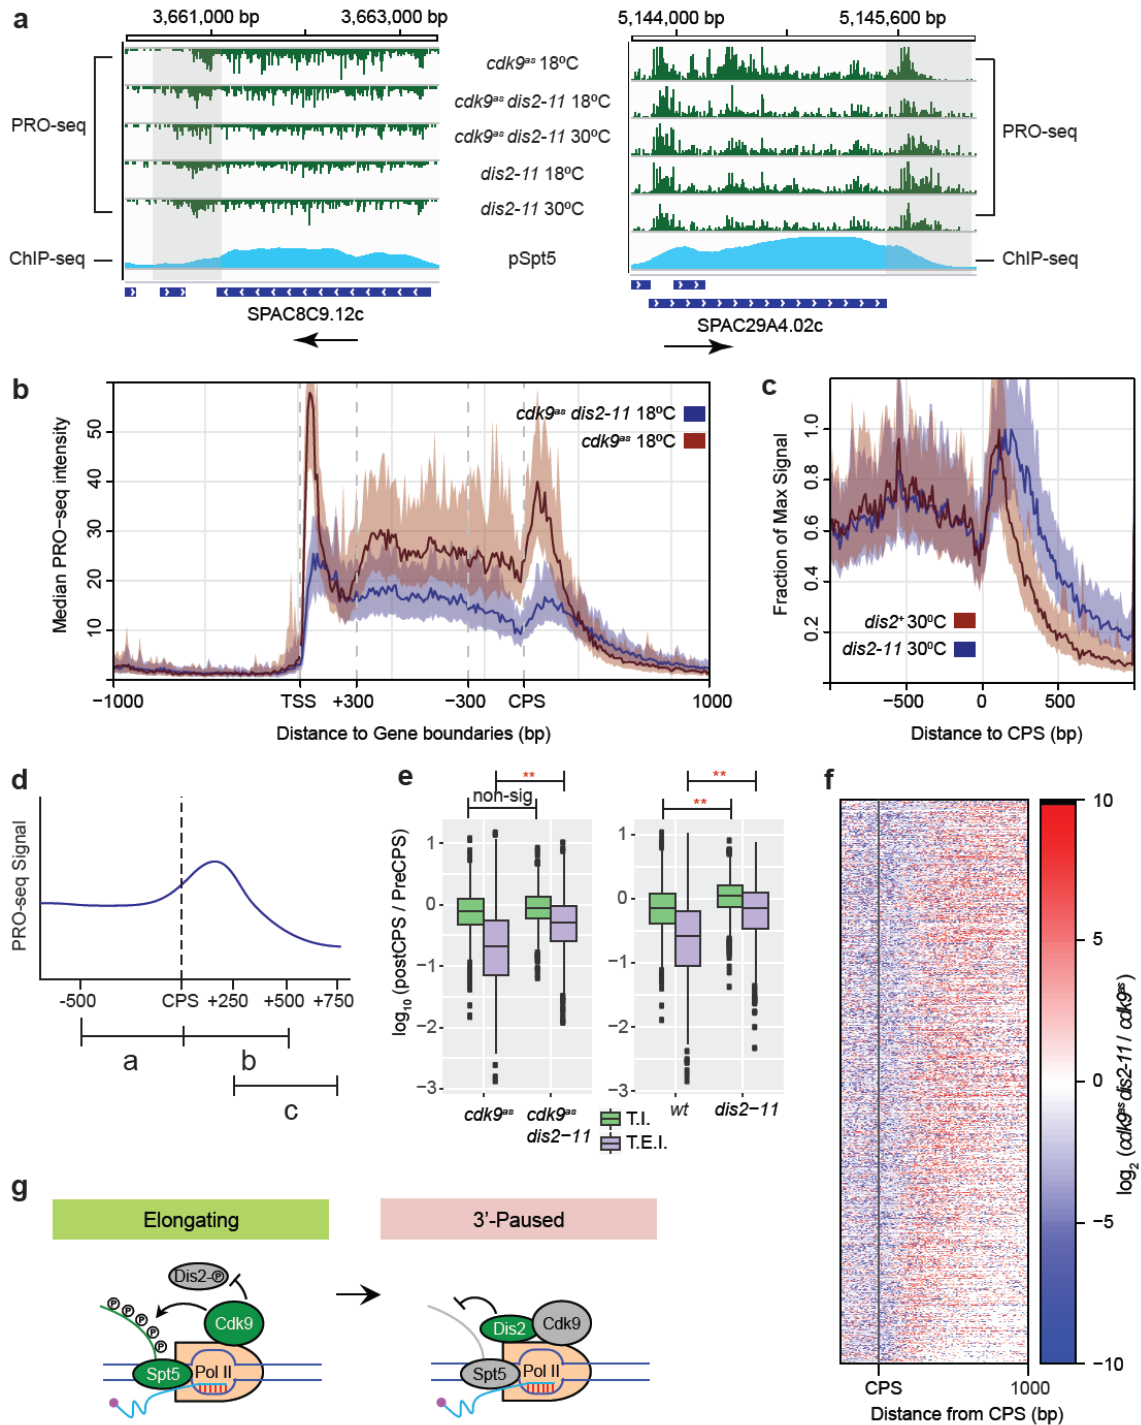

471

472 **Figure 4 | Loss of Dis2 function impairs termination.** **a**, Transcription beyond normal  
 473 termination zone in *dis2-11* cells under multiple conditions. Representative gene browser  
 474 tracks where transcription terminates within a narrowly defined zone in *dis2<sup>+</sup>* cells, but  
 475 extends ~500 bp further downstream in *dis2-11* cells at both 18°C and 30°C. Alignment

476 with ChIP-seq tracks reveals correlation between loss of pSpt5 and Dis2-dependent  
477 termination. **b**, Pleiotropic, genome-wide effects on Pol II dynamics due to *dis2-11*  
478 mutation. Metagene analysis of PRO-seq read distributions in *cdk9<sup>as</sup> dis2<sup>+</sup>* and *cdk9<sup>as</sup>*  
479 *dis2-11* strains reveals multiple differences in *dis2-11*, relative to *dis2<sup>+</sup>* cells. These  
480 analyses were performed in the absence of 3-MB-PP1 treatment; under this condition,  
481 PRO-seq read distributions were not significantly different between *cdk9<sup>+</sup>* and *cdk9<sup>as</sup>*  
482 cells, as shown in the accompanying paper by Booth *et al.* Note: To compare genes of  
483 different lengths, regions between +300 bp relative to TSS and -300 bp relative to CPS  
484 are scaled. **c**, CPS-centered metagene analysis comparing PRO-seq read distributions  
485 in wild-type and *dis2-11* cells reveals relative increase in transcription downstream of the  
486 CPS in the mutant at 30°C. Peak heights (*y* axis) were scaled as a fraction of maximum  
487 signal in each condition, whereas position along the gene (*x* axis) was unscaled. **d**, Loss  
488 of Dis2 function affects two metrics of termination efficiency, shown schematically:  
489 Termination Index (T.I.), the ratio of signals in the regions 500 bp downstream and  
490 upstream of the CPS (*b/a*); and Termination Elongation Index (T.E.I.), the ratio of signals  
491 in the region between +250 bp and +750 bp relative to CPS to that in the region 500 bp  
492 upstream of CPS (*c/a*). **e**, Box plots show that *dis2-11* mutation causes a significant  
493 increase in T.E.I. in both *cdk9<sup>as</sup>* (left) and *cdk9<sup>+</sup>* (WT, right) backgrounds, and in T.I. in  
494 *cdk9<sup>+</sup>* cells (Student's *t*-test, *p* < 0.01). **f**, Heatmaps showing change in PRO-seq read  
495 distribution due to *dis2-11* mutation. Genes were ranked by decreasing T.E.I. in *cdk9<sup>as</sup>*  
496 *dis2-11* at 18°C, a measure of termination-window size. Dis2 impairment expands this  
497 zone relative to *cdk9<sup>as</sup>* at 18°C. All genes in **b-f** were required to be active and at least 1  
498 kb from nearest genes on the same strand to eliminate effects of nearby initiation and  
499 run-through transcription (*n* = 919). **g**, A transcription exit network comprising Cdk9, Dis2  
500 and Spt5. At or near CPS, Dis2 becomes active due to a drop in Cdk9 activity and  
501 triggers Spt5 dephosphorylation, to facilitate 3'-pausing and termination.

502 **Extended Data**

**a**

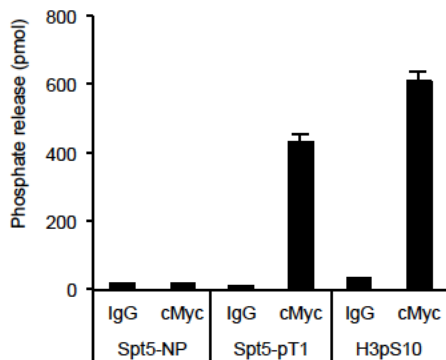

**b**

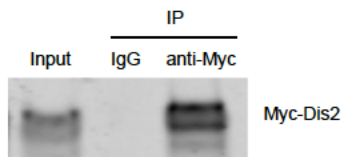

503

504 **Extended Data Figure 1 | Dis2 expressed in fission yeast dephosphorylates Spt5-**

505 **T1P *in vitro*.** **a**, Anti-Myc immunoprecipitates from extracts of Myc-Dis2-expressing cells

506 were tested for phosphatase activity towards the Spt5 CTD-derived phosphopeptide.  $n =$

507 3 biological replicates; error bars show standard deviation (s.d.). **b**, Immunoblot to verify

508 expression and immunoprecipitation of Myc-Dis2.

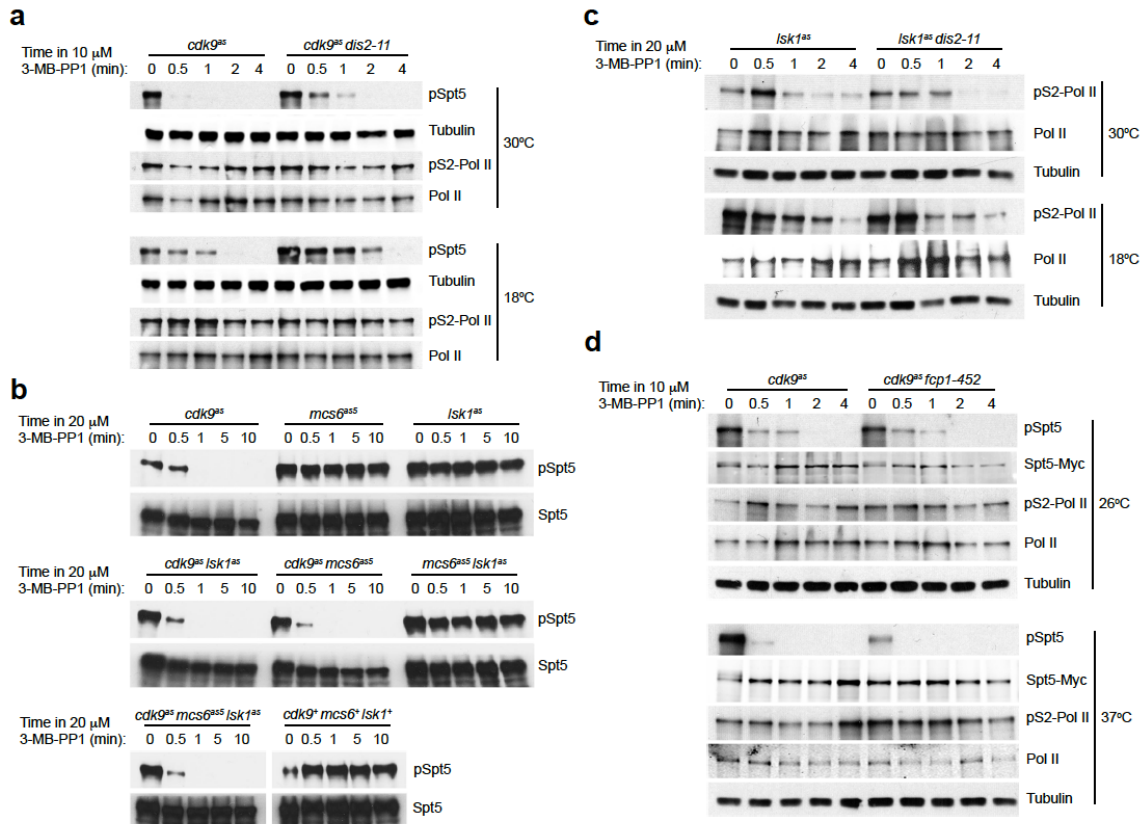

509

510 **Extended Data Figure 2 | Distinct kinase-phosphatase circuits regulate**

511 **phosphorylation of Spt5-Thr1 and Rpb1-Ser2 *in vivo*. a, Rapid kinetics of Spt5**

512 dephosphorylation after Cdk9 inhibition, and stabilization of pSpt5 by Dis2 inactivation

513 occur in *spt5<sup>+</sup>* strain and do not depend on the C-terminal Myc-epitope tag. **b, Spt5**

514 dephosphorylation kinetics in single, pairwise and triple *cdk<sup>as</sup>* mutants treated with 3-MB-

515 PP1 indicate that Cdk9 is the sole kinase needed to phosphorylate this site *in vivo*. **c,**

516 Dis2 activity is dispensable for Pol II CTD Ser2 dephosphorylation. As in **Fig. 2a** except

517 that experiment was performed in *lsk1<sup>as</sup>* cells, 20  $\mu$ M 3-MB-PP1 was added, and extracts

518 were probed for phosphorylation of the Ser2 position of the Rpb1 CTD (or tubulin as a

519 loading control). **d, Fcp1 activity is dispensable for Spt5 Thr1 dephosphorylation. As in**

520 **Fig. 2c** except that strains carried a *cdk9<sup>as</sup>* allele and were tested for both pSpt5

521 (unaffected by Fcp1 inactivation) and pS2 (unaffected by Cdk9 inhibition).



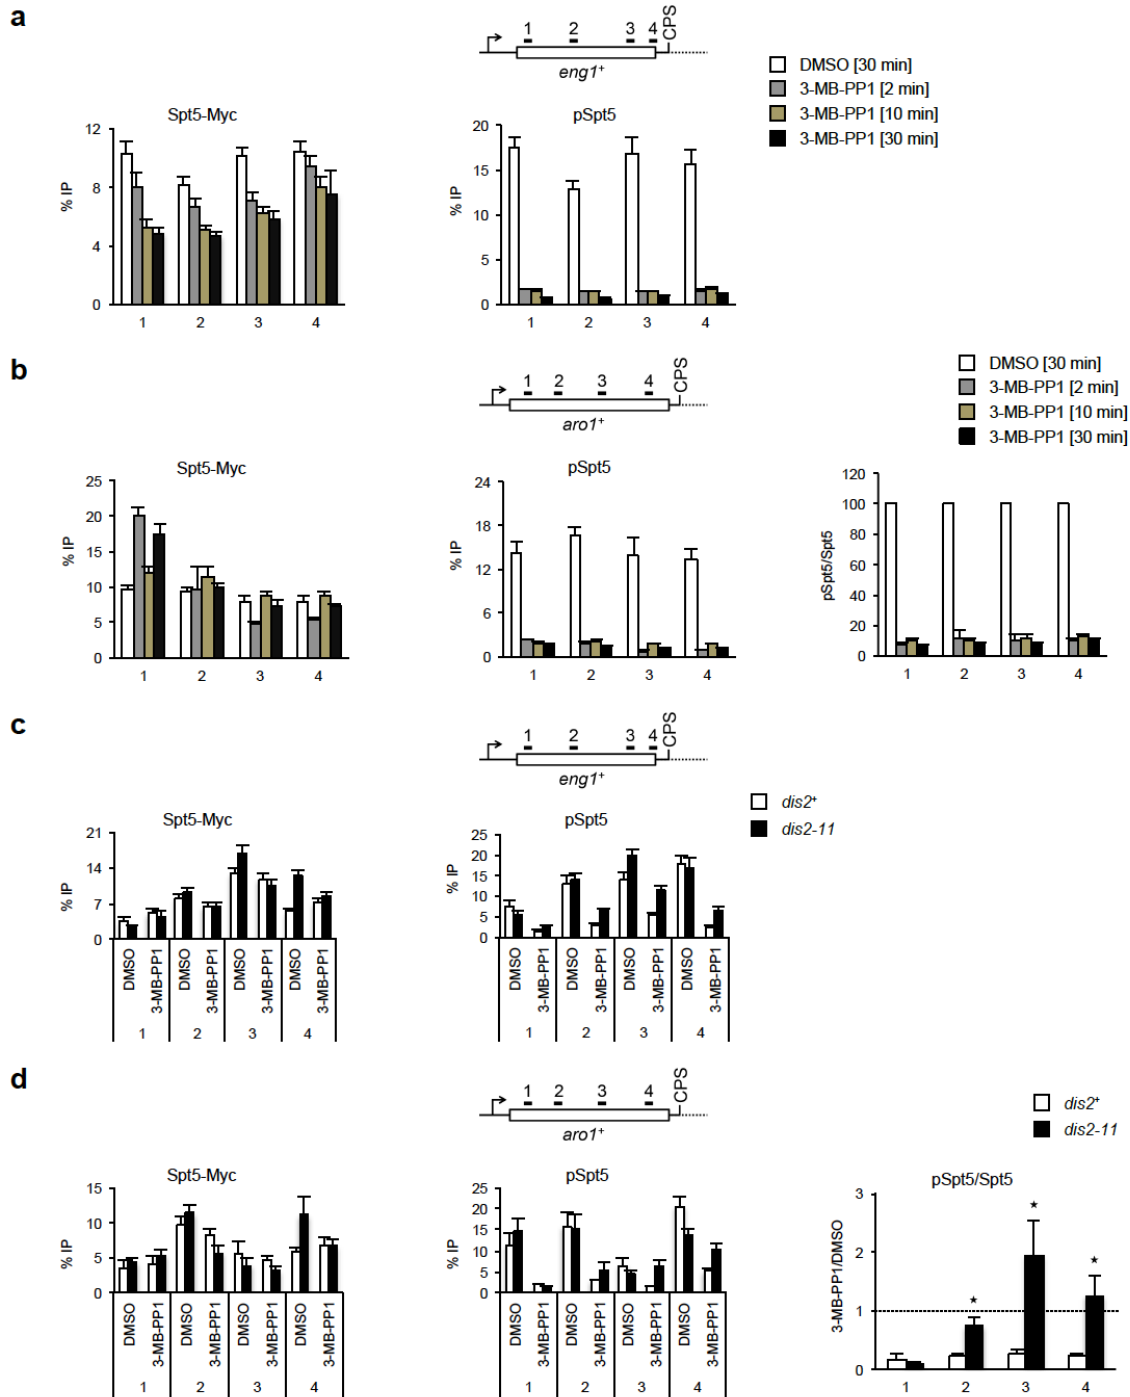

522

523 **Extended Data Figure 3 | Rapid dephosphorylation of chromatin-associated Spt5**

524 **upon Cdk9 inhibition. a,** Dephosphorylation of Spt5 on chromatin of *eng1*<sup>+</sup> gene after

525 Cdk9 inhibition (raw data for phospho- and total Spt5 from which ratios in **Fig. 2d** were

526 calculated). **b,** ChIP-qPCR analysis of phospho- versus total Spt5 crosslinking at the

527 *aro1*<sup>+</sup> gene after 3-MB-PP1 treatment for various times. Left: absolute CHIP signals for  
528 anti-Myc; middle: absolute signals for anti-pSpt5; right: ratio of phospho- to total Spt5,  
529 expressed as a percentage of ratio in the absence of the inhibitor. **c**, *Dis2* inactivation  
530 stabilizes pSpt5 on chromatin. Either *cdk9<sup>as</sup> spt5-13Myc dis2<sup>+</sup>* or *cdk9<sup>as</sup> spt5-13Myc*  
531 *dis2-11* cells were shifted to 18°C and treated with 10 μM 3-MB-PP1 or mock-treated  
532 with DMSO for 2 min and subjected to CHIP-qPCR analysis at the *eng1*<sup>+</sup> locus for pSpt5  
533 and Spt5-Myc (raw data for phospho- and total Spt5 from which ratios in **Fig. 2e** were  
534 calculated). **d**, Same as (**c**) at *aro1*<sup>+</sup> gene: CHIP-qPCR analysis of pSpt5 (left) and Spt5-  
535 Myc (middle) and the signal ratios in 3-MB-PP1- versus DMSO-treated samples (right).  
536 For **a-d**, *n* = 4 biological replicates; error bars show standard deviation (s.d.).  
537

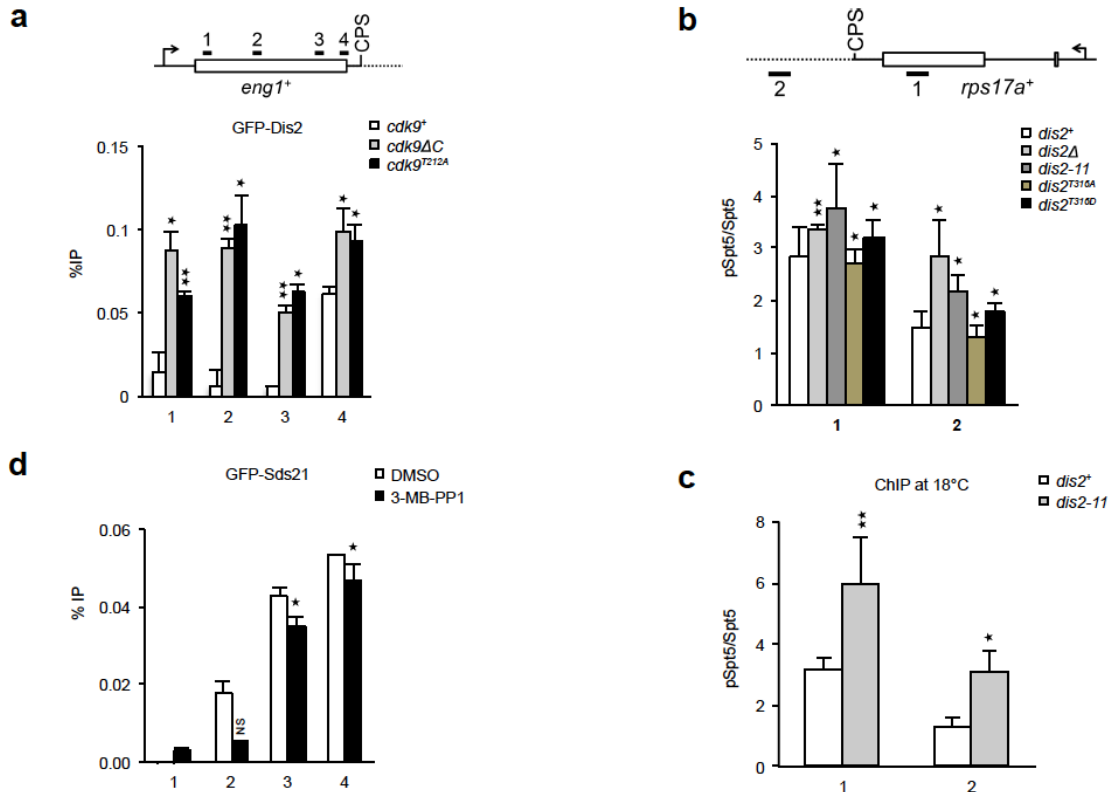

538  
539

**Extended Data Figure 4 | Cdk9 regulates PP1 recruitment to chromatin in isoform-**

540 **specific fashion.** **a**, Constitutive *cdk9* loss-of-function mutations increase GFP-Dis2  
 541 recruitment to chromatin. Dis2 occupancy at *eng1<sup>+</sup>* locus analyzed in *cdk9<sup>+</sup>* (“wt”) cells, a  
 542 *cdk9ΔC* mutant and a *cdk9<sup>T212A</sup>* mutant. **b**, Spt5 phosphorylation on chromatin in *dis2*  
 543 mutants. ChIP-qPCR analysis of indicated strains upstream and downstream of CPS on  
 544 *rps17a<sup>+</sup>* gene at 30°C. **c**, Comparison of pSpt5:Spt5 ratio upstream and downstream of  
 545 CPS on *rps17a<sup>+</sup>* gene in *dis2<sup>+</sup>* and *dis2-11* cells at 18°C. **d**, Anti-GFP ChIP at *eng1<sup>+</sup>* in a  
 546 *cdk9<sup>as</sup>* GFP-*sds21* strain treated for 10 min with 10 μM 3-MB-PP1 reveals unchanged or  
 547 slightly decreased Sds21 occupancy when Cdk9 is inhibited. For **a-d**, *n* = 4 biological  
 548 replicates; error bars show standard deviation (s.d.); asterisks indicate *p*-values  
 549 (Student’s *t*-test: [\*] *p* < 0.05; [\*\*] *p* < 0.001; [NS] not significant) (**a**) between wild-type  
 550 (*cdk9<sup>+</sup>*) and mutant (*cdk9 ΔC* or *cdk9<sup>T212A</sup>*), (**b, c**) between wild-type (*dis2<sup>+</sup>*) and mutant  
 551 (*dis2Δ*, *dis2-11*, *dis2<sup>T316A</sup>* or *dis2<sup>T316D</sup>*), or (**d**) between 3-MB-PP1 and DMSO.

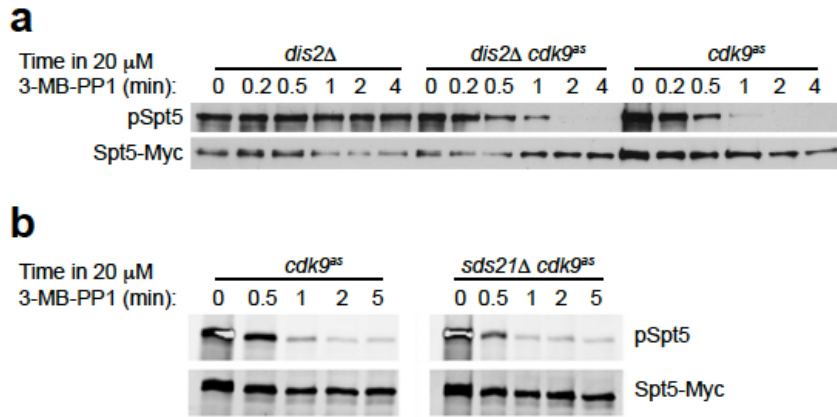

552

553 **Extended Data Figure 5 | Spt5 dephosphorylation kinetics in cells with a single PP1**

554 **isoform. a**, Dephosphorylation of Spt5 after Cdk9 inhibition is retarded in *dis2 $\Delta$*  strain,

555 relative to a *dis2<sup>+</sup>* strain. **b**, Spt5 dephosphorylation kinetics after Cdk9 inhibition are

556 unaffected by *sds21* deletion in a *dis2<sup>+</sup>* strain.

557

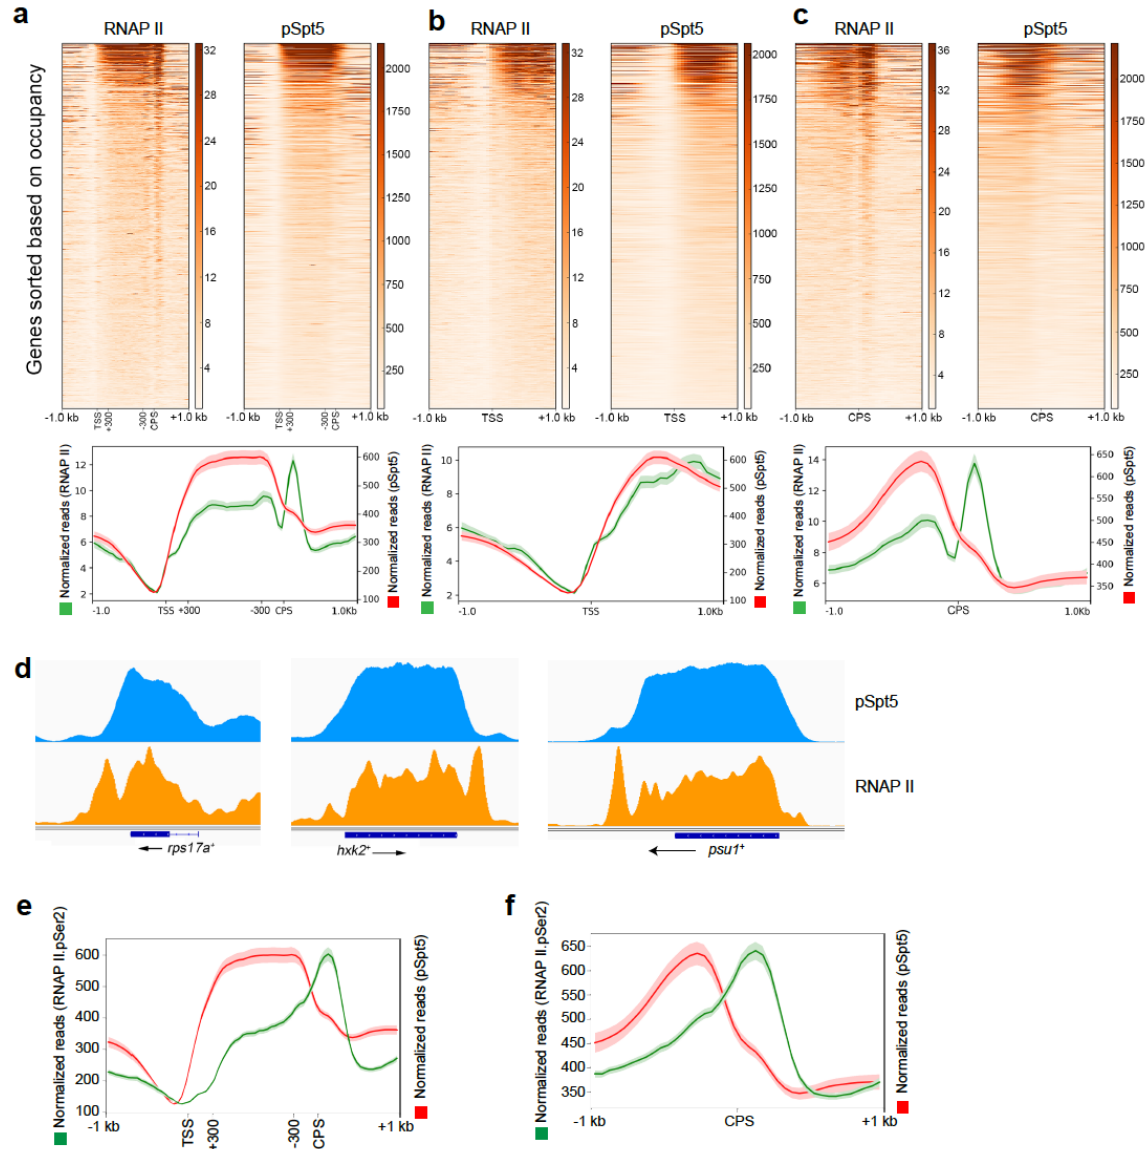

558

559 **Extended Data Figure 6 | Pol II and pSpt5 distribution on chromatin. a-c, Heatmap**

560 (top) and metagene (bottom) analyses, scaled as in **Fig. 3a-c**, of Pol II ChIP-seq data

561 compared with pSpt5 over entire gene (**a**), and in TSS (**b**) and CPS (**c**) regions. **d**,

562 Genome browser tracks of representative genes, showing occupancy of pSpt5 and Pol

563 II. **e**, Metagene analysis comparing distribution of pSpt5 and pS2 over entire gene,

564 scaled as in (**a**). **f**, Metagene analysis comparing distribution of pSpt5 and pS2 centered

565 around CPS, without scaling, as in (**c**).

566

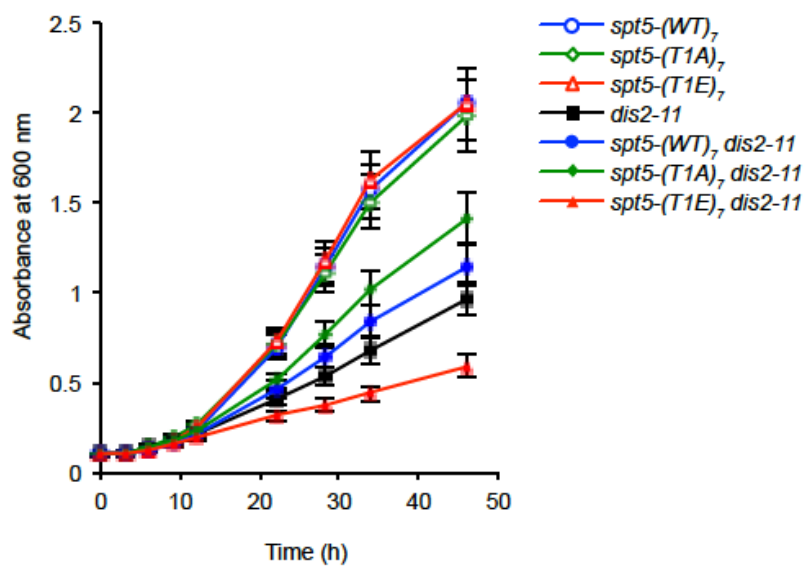

567

568 **Extended Data Figure 7 | A non-phosphorylatable Spt5 suppresses conditional**

569 **lethality of *dis2-11*.** Growth kinetics in liquid culture of indicated strains after shift to

570 18°C.

571

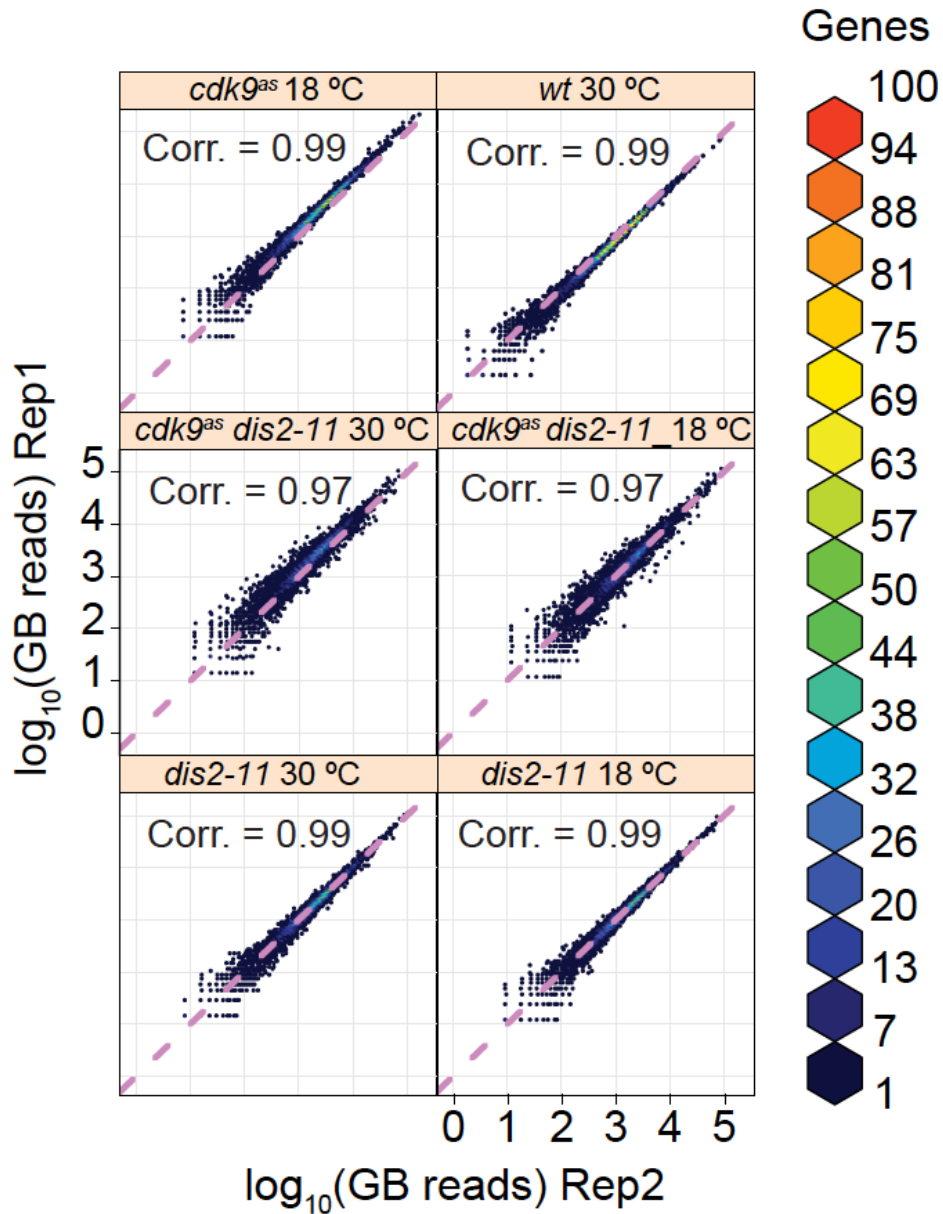

572

573 **Extended Data Figure 8 | PRO-seq experiments are reproducible.** Scatter plots  
574 comparing PRO-seq libraries from two biological replicates for each experiment. Values  
575 represent  $\log_{10}$  (normalized reads) within the gene body (TSS + 200 bp to CPS) of all  
576 filtered genes ( $n = 3330$ ). Colors indicate the number of genes represented by each  
577 point. Spike-in based normalization should center scatter about the diagonal line  $x = y$   
578 (magenta, dotted). Correlation values represent Spearman's rank correlation.

579

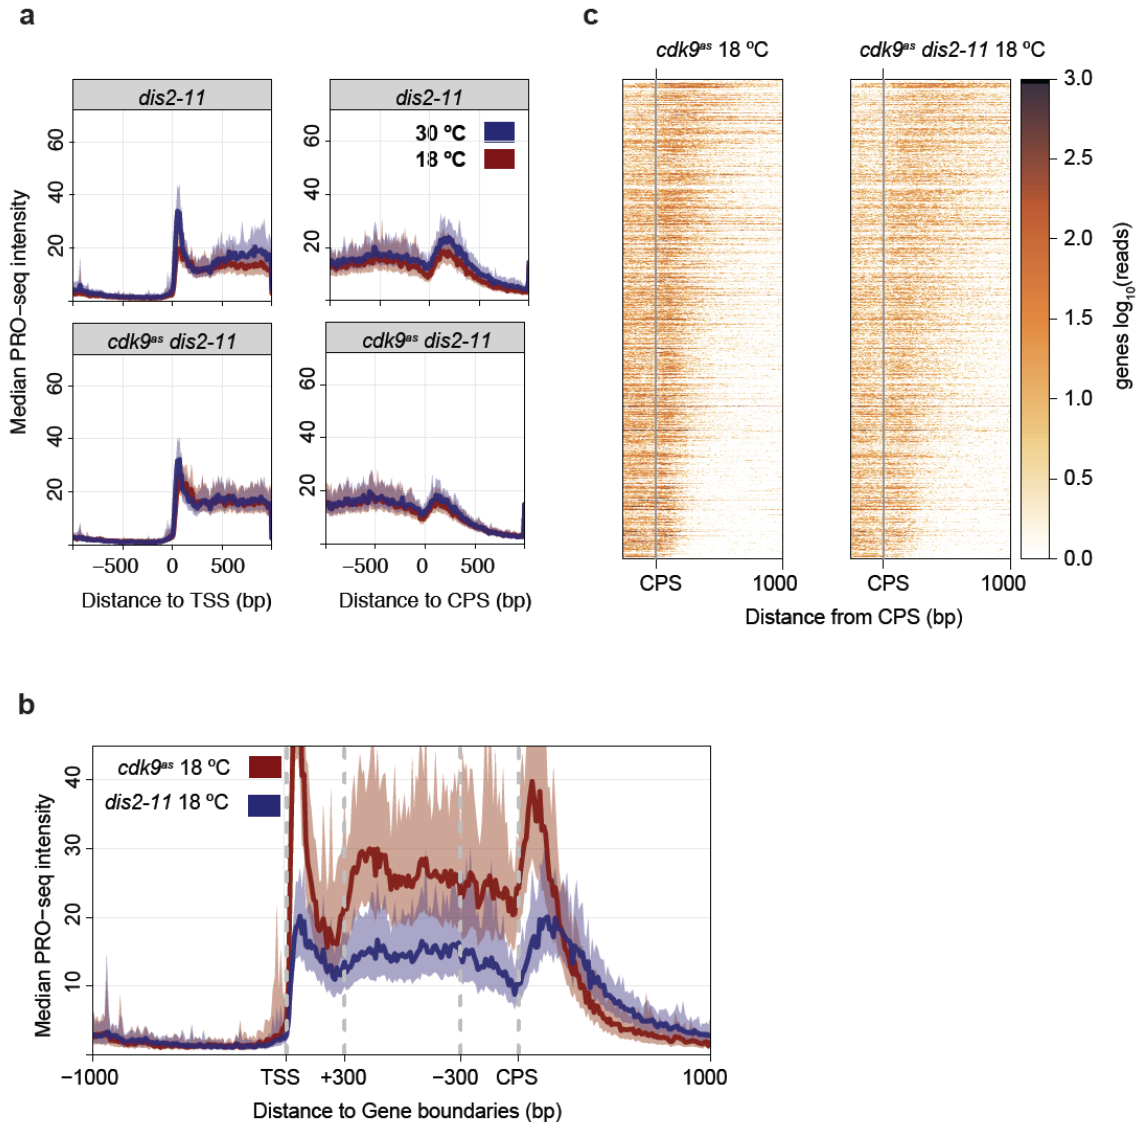

580

581 **Extended Data Figure 9 | The *dis2-11* mutation affects global transcription**

582 **properties independent of temperature. a**, Comparison of composite PRO-seq

583 profiles of the *dis2-11* mutant alone (top panels) or *cdk9<sup>as</sup> dis2-11* (bottom panels) at

584 18°C and 30°C. Profiles are either centered on the TSS (left) or CPS (right). Shaded

585 areas on composite profiles represent the 12.5 and 87.5% quantiles at each position.

586 Each panel represents data from filtered genes that are at least 1 kb from neighboring

587 genes on the same strand ( $n = 919$ ). **b**, Composite PRO-seq profiles comparing a *dis2*<sup>+</sup>

588 strain (*cdk9<sup>as</sup>*) with the *dis2-11* strain, both at 18°C. Genes were scaled to a common



589 length by fixing the middle gene body (TSS + 300 bp to CPS – 300 bp) region to 60  
590 windows. **c**, Heat maps of spike-in normalized PRO-seq signal ( $\log_{10}$ ) within 10 bp  
591 windows relative to the CPS (-250 to +1000) for *cdk9<sup>as</sup>* (left) and *cdk9<sup>as</sup> dis2-11* (right)  
592 strains at 18°C. Genes were ranked by decreasing T.E.I. in *cdk9<sup>as</sup> dis2-11* at 18°C, a  
593 measure of termination-window size.  
594

595 **Extended Data Table 1 | Yeast Strains**

| Strain  | Alias                                                         | Genotype                                                                                                                                           | Reference              |
|---------|---------------------------------------------------------------|----------------------------------------------------------------------------------------------------------------------------------------------------|------------------------|
| JS78    | wt                                                            | <i>leu1-32 ura4-D18 his3-D1 ade6-M210 h<sup>+</sup></i>                                                                                            | Saiz & Fisher 2002     |
| LV7     | <i>cdk9<sup>as</sup></i>                                      | <i>cdk9<sup>T120G</sup>::kanMX6 leu1-32 ura4-D18 his3-D1 ade6-M210 h<sup>+</sup></i>                                                               | Viladevall et al. 2009 |
| MS340   | <i>mcs6<sup>as5</sup></i>                                     | <i>mcs6<sup>N84T-L87G</sup>::kanMX6 leu1-32 ura4-D18 his3-D1 ade6-M210 h<sup>+</sup></i>                                                           | This study             |
| CS118   | <i>lsk1<sup>as</sup></i>                                      | <i>lsk1<sup>F353G</sup>::kanMX6 leu1-32 ura4-D18 his3-D1 ade6-M216 h<sup>-</sup></i>                                                               | Viladevall et al. 2009 |
| CS111   | <i>spt5-13myc</i>                                             | <i>spt5-13myc::kanMX6 leu1-32 ura4-D18 his3-D1 ade6-M210 h<sup>+</sup></i>                                                                         | Viladevall et al. 2009 |
| CS112   | <i>cdk9<sup>as</sup> spt5-13myc</i>                           | <i>cdk9<sup>T120G</sup>::kanMX6 spt5-13myc::kanMX6 leu1-32 ura4-D18 his3-D1 ade6-M210 h<sup>+</sup></i>                                            | Viladevall et al. 2009 |
| FY10092 | <i>dis2-11</i>                                                | <i>dis2-11 leu1-32 ura4-D18 h<sup>+</sup></i>                                                                                                      | NBRP, Japan            |
| CS310   | <i>spt5-(WT)<sub>7</sub></i>                                  | <i>spt5-(WT)<sub>7</sub>::ura4<sup>+</sup> leu1-32 ura4-D18 his3-D1 ade6-M216 h<sup>-</sup></i>                                                    | Schneider et al. 2010  |
| CS311   | <i>spt5-(T1A)<sub>7</sub></i>                                 | <i>spt5-(T1A)<sub>7</sub>::ura4<sup>+</sup> leu1-32 ura4-D18 his3-D1 ade6-M216 h<sup>-</sup></i>                                                   | Schneider et al. 2010  |
| CS312   | <i>spt5-(T1E)<sub>7</sub></i>                                 | <i>spt5-(T1E)<sub>7</sub>::ura4<sup>+</sup> leu1-32 ura4-D18 his3-D1 ade6-M216 h<sup>-</sup></i>                                                   | Schneider et al. 2010  |
| LV223   | <i>cdk9<sup>as</sup> spt5-13myc fcp1-452</i>                  | <i>cdk9<sup>T120G</sup>::kanMX6 spt5-13myc::kanMX6 fcp1-452 leu1-32 ura4-D18 his3-D1 ade6-M210</i>                                                 | This study             |
| PP14    | <i>spt5-13Myc dis2Δ</i>                                       | <i>spt5-13myc::kanMX6 dis2Δ::ura4<sup>+</sup> ura4-D18 leu1-32 h<sup>-</sup></i>                                                                   | This study             |
| PP17    | <i>cdk9<sup>as</sup> spt5-13Myc dis2Δ</i>                     | <i>cdk9<sup>T120G</sup>::kanMX6 spt5-13myc::kanMX6 dis2Δ::ura4<sup>+</sup> ura4-D18 leu1-33 h<sup>+</sup></i>                                      | This study             |
| PP20    | <i>cdk9<sup>as</sup> lsk1<sup>as</sup></i>                    | <i>cdk9<sup>T120G</sup>::hphMX6 lsk1<sup>F353G</sup>::kanMX6 leu1-32 ura4-D18 his3-D1 ade6-M210 h<sup>+</sup></i>                                  | This study             |
| PP23    | <i>cdk9<sup>as</sup> mcs6<sup>as5</sup></i>                   | <i>cdk9<sup>T120G</sup>::hphMX6 mcs6<sup>N84T-L87G</sup>::kanMX6 leu1-32 ura4-D18 his3-D1 ade6-M210 h<sup>-</sup></i>                              | This study             |
| PP26    | <i>mcs6<sup>as5</sup> lsk1<sup>as</sup></i>                   | <i>mcs6<sup>N84T-L87G</sup>::kanMX6 lsk1<sup>F353G</sup>::kanMX6 leu1-32 ura4-D18 his3-D1 ade6-M210 h<sup>-</sup></i>                              | This study             |
| PP29    | <i>cdk9<sup>as</sup> mcs6<sup>as5</sup> lsk1<sup>as</sup></i> | <i>cdk9<sup>T120G</sup>::hphMX6 mcs6<sup>N84T-L87G</sup>::kanMX6 lsk1<sup>F353G</sup>::kanMX6 leu1-32 ura4-D18 his3-D1 ade6-M210 h<sup>-</sup></i> | This study             |
| PP38    | <i>spt5-13Myc dis2-11</i>                                     | <i>spt5-13myc::kanMX6 dis2-11 ura4-D18 leu1-32 h<sup>+</sup></i>                                                                                   | This study             |
| PP40    | <i>cdk9<sup>as</sup> spt5-13Myc dis2-11</i>                   | <i>cdk9<sup>T120G</sup>::kanMX6 spt5-13myc::kanMX6 dis2-11 ura4-D18 leu1-32 h<sup>-</sup></i>                                                      | This study             |
| PP43    | <i>cdk9<sup>as</sup> spt5-13Myc sds21Δ</i>                    | <i>cdk9<sup>T120G</sup>::kanMX6 spt5-13myc::kanMX6 sds21Δ::ura4<sup>+</sup> ura4-D18 leu1-32</i>                                                   | This study             |
| PP55    | <i>cdk9<sup>as</sup> spt5-13Myc GFP-dis2</i>                  | <i>cdk9<sup>T120G</sup>::kanMx spt5-13Myc::kanMx GFP-dis2::ura4<sup>+</sup> ura4-D18 leu1-32</i>                                                   | This study             |
| PP69    | <i>spt5-13Myc dis2<sup>T316D</sup></i>                        | <i>spt5-13Myc::kanMx dis2<sup>T316D</sup>::ura4<sup>+</sup> ura4-D18 leu1-32 h<sup>-</sup></i>                                                     | This study             |
| PP75    | <i>spt5-13Myc dis2<sup>T316A</sup></i>                        | <i>spt5-13Myc::kanMx dis2<sup>T316A</sup>::ura4<sup>+</sup> ura4-D18 leu1-32 h<sup>+</sup></i>                                                     | This study             |
| PP84    | <i>cdk9ΔC GFP-dis2</i>                                        | <i>cdk9ΔC::kanMx GFP-dis2::ura4<sup>+</sup> ura4-D18 leu1-32</i>                                                                                   | This study             |
| PP88    | <i>cdk9<sup>T212A</sup> GFP-dis2</i>                          | <i>cdk9<sup>T212A</sup>::kanMx GFP-dis2::ura4<sup>+</sup> ura4-D18 leu1-32 h<sup>-</sup></i>                                                       | This study             |
| PP100   | <i>spt5-(WT)<sub>7</sub> dis2-11</i>                          | <i>spt5-(WT)<sub>7</sub>::ura4<sup>+</sup> dis2-11 ura4-D18 leu1-32</i>                                                                            | This study             |
| PP103   | <i>spt5-(T1A)<sub>7</sub> dis2-11</i>                         | <i>spt5-(T1A)<sub>7</sub>::ura4<sup>+</sup> dis2-11 ura4-D18 leu1-32</i>                                                                           | This study             |
| PP105   | <i>spt5-(T1E)<sub>7</sub> dis2-11</i>                         | <i>spt5-(T1E)<sub>7</sub>::ura4<sup>+</sup> dis2-11 ura4-D18 leu1-32</i>                                                                           | This study             |
| PP125   | <i>cdk9<sup>as</sup> spt5-13Myc GFP-sds21</i>                 | <i>cdk9<sup>T120G</sup>::kanMx spt5-13Myc::kanMx GFP-sds21::ura4<sup>+</sup></i>                                                                   | This study             |
| PP185   | <i>cdk9<sup>as</sup> dis2-11</i>                              | <i>cdk9<sup>T120G</sup>::natMx dis2-11 ura4-D18 leu1-32</i>                                                                                        | This study             |
| PP217   | <i>lsk1<sup>as</sup> dis2-11</i>                              | <i>lsk1<sup>F353G</sup>::kanMX dis2-11 ura4-D18 leu1-32</i>                                                                                        | This study             |
| PP220   | <i>lsk1<sup>as</sup> fcp1-452</i>                             | <i>lsk1<sup>F353G</sup>::kanMX fcp1-452 ura4-D18 leu1-32</i>                                                                                       | This study             |

596
